# Supplementary material
Source: PubMed Central journal article supplement (PMC7144170)
Supplement: ao9b04450_si_001.pdf [file ao9b04450_si_001.pdf]

*Supplementary Information*

Nickel (II) nanoparticles immobilized on EDTA-modified Fe<sub>3</sub>O<sub>4</sub>@SiO<sub>2</sub> nanospheres as efficient and recyclable catalysts for **ligand-free Suzuki-Miyaura Coupling of Aryl Carbamates and Sulfamates**

Iman Dindarloo Inaloo,<sup>\*a</sup> Sahar Majnooni,<sup>b</sup> Hassan Eslahi<sup>a</sup> and Mohsen Esmailpour<sup>a</sup>

<sup>a</sup> Chemistry Department, College of Sciences, Shiraz University, Shiraz, Iran

<sup>b</sup> Department of Chemistry, University of Isfahan, Isfahan 81746-73441, Iran

\*Corresponding author. Tel.: +98 7116137107, fax: +98 7112286008.

E-mail addresses: [iman.dindarlooinaloo@gmail.com](mailto:iman.dindarlooinaloo@gmail.com) (I. Dindarloo Inaloo)

## Contents

|                                                |     |
|------------------------------------------------|-----|
| <i>Contents</i> .....                          | S2  |
| <i>1. Reaction Optimization</i> .....          | S3  |
| <i>2. Experimental</i> .....                   | S4  |
| <i>2.1. General experimental methods</i> ..... | S4  |
| <i>2.2. Chemicals</i> .....                    | S5  |
| <i>3. NMR Spectra of Compounds</i> .....       | S14 |

**1. Reaction Optimization:**

**Table S1.** Optimization of catalyst loading.<sup>a</sup>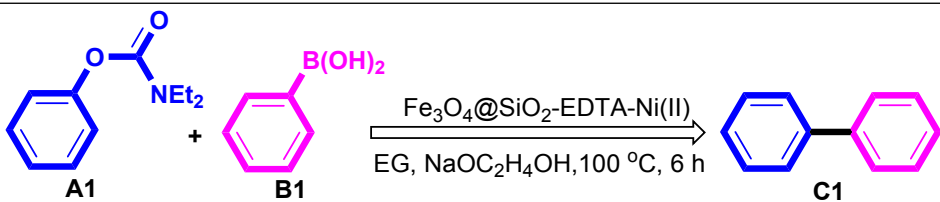

Reaction scheme showing the synthesis of biphenyl (C1) from phenyl carbamate (A1) and phenylboronic acid (B1) using  $\text{Fe}_3\text{O}_4@\text{SiO}_2\text{-EDTA-Ni(II)}$  catalyst in EG,  $\text{NaOC}_2\text{H}_4\text{OH}$ , 100 °C, 6 h.

| Entry | $\text{Fe}_3\text{O}_4@\text{SiO}_2\text{-EDTA-Ni(II)}$ (mol %) | Yield (%) <sup>b</sup> |
|-------|-----------------------------------------------------------------|------------------------|
| 1     | 0.5                                                             | 64                     |
| 2     | 1.0                                                             | 91                     |
| 3     | 1.5                                                             | 91                     |
| 4     | 2                                                               | 91                     |

<sup>a</sup> Reaction conditions: phenyl carbamate (1 mmol), phenylboronic acid (1 mmol),  $\text{NaOC}_2\text{H}_4\text{OH}$  (2.0 mmol),  $\text{Fe}_3\text{O}_4@\text{SiO}_2\text{-EDTA-Ni(II)}$  catalyst, EG (3 mL), 100 °C, 6 h.

<sup>b</sup> Isolated yield.

**Table S2.** Optimization of reaction temperature.<sup>a</sup>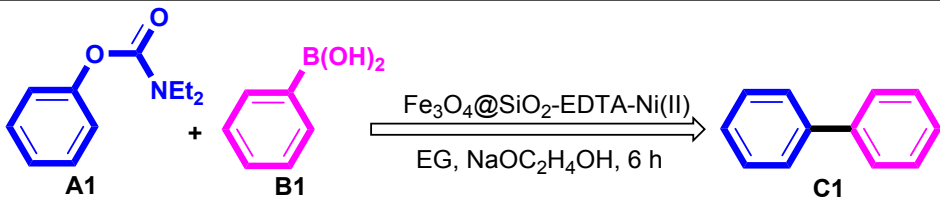

Reaction scheme showing the synthesis of biphenyl (C1) from phenyl carbamate (A1) and phenylboronic acid (B1) using  $\text{Fe}_3\text{O}_4@\text{SiO}_2\text{-EDTA-Ni(II)}$  catalyst in EG,  $\text{NaOC}_2\text{H}_4\text{OH}$ , 6 h.

| Entry | Temperature (°C) | Yield (%) <sup>b</sup> |
|-------|------------------|------------------------|
| 1     | 80               | 69                     |
| 2     | 90               | 82                     |
| 3     | 100              | 91                     |
| 4     | 110              | 90                     |
| 5     | 120              | 89                     |

<sup>a</sup> Reaction conditions: phenyl carbamate (1 mmol), phenylboronic acid (1 mmol),  $\text{NaOC}_2\text{H}_4\text{OH}$  (2.0 mmol),  $\text{Fe}_3\text{O}_4@\text{SiO}_2\text{-EDTA-Ni(II)}$  catalyst (0.018 g, 1 mol %), EG (3 mL), 6 h.

<sup>b</sup> Isolated yield.

**Table S3.** Optimization of reaction time.<sup>a</sup>

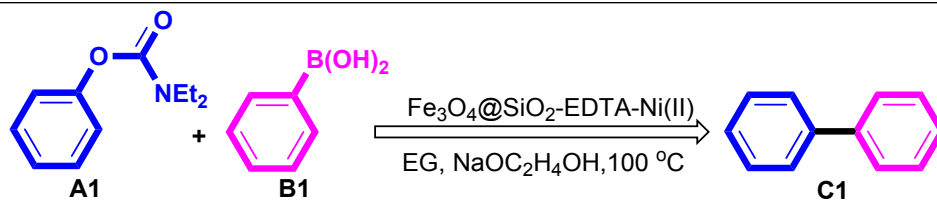

| Entry | Time (h) | Yield (%) <sup>b</sup> |
|-------|----------|------------------------|
| 1     | 4        | 73                     |
| 2     | 6        | 91                     |
| 3     | 8        | 90                     |
| 4     | 12       | 89                     |

<sup>a</sup> Reaction conditions: phenyl carbamate (1 mmol), phenylboronic acid (1 mmol), NaOC<sub>2</sub>H<sub>4</sub>OH (2.0 mmol), Fe<sub>3</sub>O<sub>4</sub>@SiO<sub>2</sub>-EDTA-Ni(II) catalyst (0.018 g, 1 mol %), EG (3 mL), 100 °C.

<sup>b</sup> Isolated yield.

## 2. Experimental:

### 2.1 General experimental methods:

The products were characterized by comparison of their spectral and physical data such as NMR and CHNS with available literature data. <sup>1</sup>H and <sup>13</sup>C NMR spectra were recorded with Bruker Avance DPX 250MHz instruments with Me<sub>4</sub>Si or solvent resonance as the internal standard. <sup>1</sup>H NMR spectroscopic data are reported as follows: chemical shift, multiplicity (s = singlet, d = doublet, t = triplet, q = quartet, quint = quintet, sext = sextet, sept = septet, br. = broad, m = multiplet), coupling constants (Hz), and integration. Elemental analysis was performed using Thermofinigan Flash EA-1112 CHNSO rapid elemental analyzer. Determination of the purity of the substrate and monitoring of the reaction were accomplished by thin-layer chromatography (TLC) on a silica-gel polygram SILG/UV 254 plates.

## 2.2 Chemicals:

All starting materials and solvents were purchased from the Merck, Flucka and Aldrich Chemical Companies in high purity.

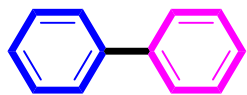

### Biphenyl (C1):

Colorless crystals; mp = 69-70 °C;  $^1\text{H}$  NMR (250 MHz,  $\text{CDCl}_3$ )  $\delta$ : 7.19-7.33 (m, 10H) ppm;  $^{13}\text{C}$ -NMR (63 MHz,  $\text{CDCl}_3$ )  $\delta$ : 145.3, 130.1, 127.5, 127.2 ppm; Anal. Calcd. for  $\text{C}_{12}\text{H}_{10}$ ; C: 93.46, H: 6.54%, Found: C: 93.38, H: 6.60%.

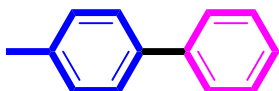

### 4-Methylbiphenyl (C2 and C19):

Colorless crystals; mp = 46-47 °C;  $^1\text{H}$  NMR (250 MHz,  $\text{CDCl}_3$ )  $\delta$ : 7.62-7.74 (m, 2H), 7.37-7.55 (m, 7H), 2.53 (s, 3H) ppm;  $^{13}\text{C}$  NMR (63 MHz,  $\text{CDCl}_3$ )  $\delta$ : 138.1, 132.1, 131.4, 130.1, 129.4, 128.8, 127.8, 127.5, 21.6 ppm; Anal. Calcd. for  $\text{C}_{13}\text{H}_{12}$ ; C: 92.81, H: 7.19%, Found: C: 92.78, H, 7.18%.

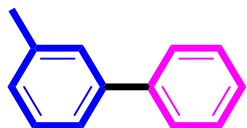

### 3-Methylbiphenyl (C3):

Colorless liquid;  $^1\text{H}$  NMR (250 MHz,  $\text{CDCl}_3$ )  $\delta$ : 7.70 (,  $J$ = 9.7 Hz, 2H), 7.22-7.33 (m, 7H), 2.52 (s, 3H) ppm;  $^{13}\text{C}$ NMR (63 MHz,  $\text{CDCl}_3$ )  $\delta$ : 141.7, 140.4, 138.3, 129.5, 128.5, 128.2, 126.7, 124.7, 20.7 ppm; Anal. Calcd. for  $\text{C}_{13}\text{H}_{12}$ ; C: 92.81, H, 7.19%, Found: C: 92.79, H, 7.16%.

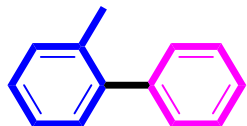

### 2-Methylbiphenyl (C4):

Colorless liquid;  $^1\text{H}$  NMR (250 MHz,  $\text{CDCl}_3$ )  $\delta$ : 7.22-7.38 (m, 9H), 2.28 (s, 3H) ppm;  $^{13}\text{C}$ NMR (63 MHz,  $\text{CDCl}_3$ )  $\delta$ : 141.6, 141.3, 135.2, 130.3, 128.7, 128.5, 127.5, 127.0, 126.4, 125.2, 21.5 ppm; Anal. Calcd. for  $\text{C}_{13}\text{H}_{12}$ ; C: 92.81, H, 7.19%, Found: C: 92.76, H, 7.17%.

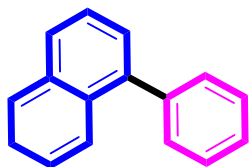

#### 1-Phenylnaphthalene (C5):

Colorless liquid;  $^1\text{H}$  NMR (250 MHz,  $\text{CDCl}_3$ )  $\delta$ : 7.82-7.99 (m, 7H), 7.24-7.52 (m, 5H) ppm;  $^{13}\text{C}$  NMR (63 MHz,  $\text{CDCl}_3$ )  $\delta$ : 141.7, 140.6, 137.3, 133.5, 131.2, 129.2, 128.6, 128.4, 126.8, 126.2, 126.0, 125.9, 125.0 ppm; Anal. Calcd. for  $\text{C}_{16}\text{H}_{12}$ ; C: 94.08, H: 5.92%, Found: C: 93.98, H: 5.98%.

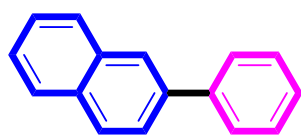

#### 2-Phenylnaphthalene (C6):

Colorless crystals; mp = 98-100 °C;  $^1\text{H}$  NMR (250 MHz,  $\text{CDCl}_3$ )  $\delta$ : 8.02 (s, 1H), 7.87-7.90 (m, 4H), 7.68-7.79 (m, 2H), 7.41-7.49 (m, 3H), 7.36 (d,  $J$  = 9.7 Hz, 2H) ppm;  $^{13}\text{C}$  NMR (63 MHz,  $\text{CDCl}_3$ )  $\delta$ : 141.3, 138.6, 134.2, 133.9, 132.9, 132.2, 128.7, 127.1, 127.0, 126.9, 125.9, 125.8 ppm; Anal. Calcd. for  $\text{C}_{16}\text{H}_{12}$ ; C: 94.08%, H: 5.92, Found: C: 94.01, H: 5.91%.

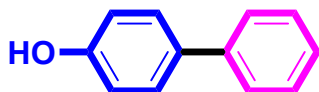

#### Biphenyl-4-ol (C7):

Colorless crystals, mp = 165-166 °C.  $^1\text{H}$  NMR (250 MHz,  $\text{CDCl}_3$ )  $\delta$ : 7.33-7.17 (m, 7H), 6.94-6.88 (m, 2H), 4.00 (s, br, 1H) ppm;  $^{13}\text{C}$  NMR (63 MHz,  $\text{CDCl}_3$ )  $\delta$ : 156.8, 142.2, 135.8, 132.0, 128.7, 128.5, 128.4, 120.2; Anal. Calcd. for  $\text{C}_{12}\text{H}_{10}\text{O}$ ; C: 84.68%, H: 5.92, Found: C: 84.91, H: 5.99%.

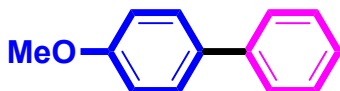

#### 4-Methoxybiphenyl (C8):

Colorless crystals, mp = 88-90 °C.  $^1\text{H}$  NMR (250 MHz,  $\text{CDCl}_3$ )  $\delta$ : 7.33-7.22 (m, 7H), 7.08-7.03 (m, 2H), 3.87 (s, 3H) ppm;  $^{13}\text{C}$  NMR (63 MHz,  $\text{CDCl}_3$ )  $\delta$ : 153.5, 142.8, 136.1, 133.0, 129.5,

128.5, 128.2, 118.9, 55.35 ppm; Anal. Calcd. for C<sub>13</sub>H<sub>12</sub>O; C: 84.75, H: 6.57, Found: C: 84.68, H: 6.59 %.

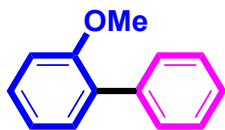

#### 2-Methoxybiphenyl (C9):

Colorless liquid. <sup>1</sup>H NMR (250 MHz, CDCl<sub>3</sub>) δ: 7.54 (d, *J* = 8.1 Hz, 2H), 7.29-7.42 (m, 5H), 6.97-7.04 (m, 2H), 3.79 (s, 3H) ppm; <sup>13</sup>C NMR (63 MHz, CDCl<sub>3</sub>) δ: 157.0, 138.9, 131.2, 129.6, 128.9, 128.1, 127.0, 121.1, 111.5, 55.6 ppm; Anal. Calcd. for C<sub>13</sub>H<sub>12</sub>O; C: 84.75, H: 6.57, Found: C: 84.67, H: 6.59%.

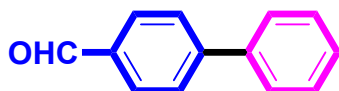

#### 4-Biphenylcarbaldehyde (C10):

Colorless crystals, mp = 57-58 °C. <sup>1</sup>H NMR (250 MHz, CDCl<sub>3</sub>) δ: 10.13 (s, 1H), 7.38-7.23 (m, 7H), 7.07-7.00 (m, 2H) ppm; <sup>13</sup>C NMR (63MHz, CDCl<sub>3</sub>) δ: 196.5, 153.4, 133.4, 126.3, 125.9, 125.6, 124.3, 120.8, 116.1 ppm; Anal. Calcd. for C<sub>13</sub>H<sub>10</sub>O; C: 85.69, H: 5.53, Found: C: 85.65, H: 5.54 %.

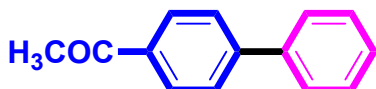

#### 1-(4-Biphenyl)ethanone (C11):

Colorless crystals, mp = 115-116 °C. <sup>1</sup>H NMR (250 MHz, CDCl<sub>3</sub>) δ: 7.85 (dd, *J* = 7.5 Hz, *j* = 2 Hz, 2H), 7.41 (dd, *J* = 7.5 Hz, *j* = 2 Hz, 2H), 7.35-7.29 (m, 5H), 2.50 (m, 3H) ppm; <sup>13</sup>C NMR (63 MHz, CDCl<sub>3</sub>) δ: 197.2, 153.1, 135.9, 130.1, 128.9, 128.8, 128.7, 123.9, 117.9, 26.6 ppm; Anal. Calcd. for C<sub>14</sub>H<sub>12</sub>O; C: 85.68, H: 6.16 %, Found: C: 85.61, H: 6.19 %.

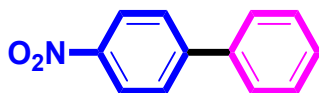

#### 4-Nitrobiphenyl (C12):

Light yellow crystals, mp = 111-112 °C. <sup>1</sup>H NMR (250 MHz, CDCl<sub>3</sub>) δ: 8.31 (d, *J* = 9.0 Hz, 2H), 7.45-7.76 (m, 7H) ppm; <sup>13</sup>C NMR (63 MHz, CDCl<sub>3</sub>) δ: 147.8, 141.1, 129.7, 129.5, 128.9, 127.9, 127.6, 124.9 ppm; Anal. Calcd. for C<sub>12</sub>H<sub>9</sub>NO<sub>2</sub>; C: 72.35, H: 4.55, N: 7.03, Found: C: 72.32, H: 4.51, N: 7.06 %.

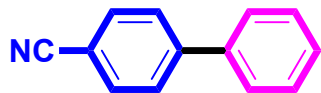

#### 4-Biphenylcarbonitrile (C13):

Colorless crystals, mp = 81-82 °C.  $^1\text{H}$  NMR (250 MHz,  $\text{CDCl}_3$ )  $\delta$ : 7.58-7.76 (m, 6H), 7.41-7.48 (m, 3H) ppm;  $^{13}\text{C}$  NMR (63 MHz,  $\text{CDCl}_3$ )  $\delta$ : 146.2, 139.8, 132.1, 129.9, 129.3, 128.7, 127.3, 118.6, 110.8 ppm; Anal. Calcd. for  $\text{C}_{13}\text{H}_9\text{N}$ ; C: 87.12, H: 5.06, N: 7.82%, Found: C: 87.08, H: 5.01, N: 7.89%.

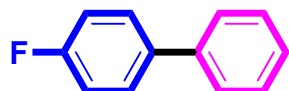

#### 4-Fluorobiphenyl (C14):

Colorless crystals, mp = 72-74 °C.  $^1\text{H}$  NMR (250 MHz,  $\text{CDCl}_3$ )  $\delta$ : 7.53-7.58 (m, 2H), 7.34-7.45 (m, 5H), 7.13 (t,  $J$ = 9.0 Hz, 2H) ppm;  $^{13}\text{C}$  NMR (63 MHz,  $\text{CDCl}_3$ )  $\delta$ : 163.7, 161.1, 137.1, 128.8, 128.7, 127.5, 127.4, 115.3 ppm; Anal. Calcd. For:  $\text{C}_{12}\text{H}_9\text{F}$ ; C: 83.70, H: 5.27%, Found. C: 83.55, H: 5.38%.

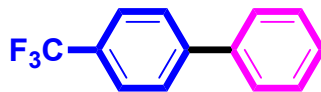

#### 4-(Trifluoromethyl)biphenyl (C15):

Colorless crystals, mp = 64-65 °C.  $^1\text{H}$  NMR (250 MHz,  $\text{CDCl}_3$ )  $\delta$ : 7.46-7.37 (m, 5H), 7.28 (d,  $J$ = 7.5 Hz, 2H) 7.08 (d,  $J$ = 7.5 Hz, 2H) ppm;  $^{13}\text{C}$  NMR (63 MHz,  $\text{CDCl}_3$ )  $\delta$ : 144.5, 139.5, 132.1, 131.9, 130.9, 128.8, 128.4, 125.1, 123.4 ppm; Anal. Calcd. For:  $\text{C}_{13}\text{H}_9\text{F}_3$ ; C: 70.27, H: 4.08%, Found. C: 70.24, H: 4.11%.

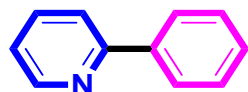

#### 2-Phenylpyridine (C16):

Colorless crystals, mp = 75-76 °C.  $^1\text{H}$  NMR (250 MHz,  $\text{CDCl}_3$ )  $\delta$ : 8.71 (s, 1H), 7.43-7.99 (m, 7H), 7.23 (d,  $J$ = 9.0 Hz, 1H) ppm;  $^{13}\text{C}$  NMR (63 MHz,  $\text{CDCl}_3$ )  $\delta$ : 157.1, 149.3, 139.5, 137.0, 127.7, 126.3, 122.4, 120.3 ppm; Anal. Calcd. For:  $\text{C}_{11}\text{H}_9\text{N}$ ; C: 85.13, H: 5.85, N: 9.03%, Found. C: 85.31, H: 5.52, N: 9.13%.



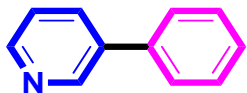

### 3-Phenylpyridine (C17):

Colorless crystals, mp = 114-116 °C.  $^1\text{H}$  NMR (250 MHz,  $\text{CDCl}_3$ )  $\delta$ : 8.86 (s, 1H), 8.59 (d,  $J$ = 4.0 Hz, 1H), 7.86-7.88 (m, 1H), 7.33-7.59 (m, 6H) ppm;  $^{13}\text{C}$  NMR (63 MHz,  $\text{CDCl}_3$ )  $\delta$ : 149.4, 149.3, 137.8, 136.8, 134.5, 129.1, 128.3, 127.1, 123.4 ppm; Anal. Calcd. For:  $\text{C}_{11}\text{H}_9\text{N}$ ; C: 85.13, H: 5.85, N: 9.03%, Found. C: 85.26, H: 5.57, N: 9.14%.

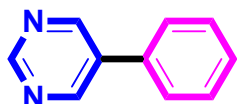

### 5-Phenylpyrimidine (C18):

Colorless crystals, mp = 39-41 °C.  $^1\text{H}$  NMR (250 MHz,  $\text{CDCl}_3$ )  $\delta$ : 9.23 (s, 1H), 8.86 (d,  $J$ = 8.0 Hz, 2H), 7.53-7.48 (m, 5H) ppm;  $^{13}\text{C}$  NMR (63 MHz,  $\text{CDCl}_3$ )  $\delta$ : 157.5, 153.0, 132.4, 130.9, 129.2, 128.8, 127.1; Anal. Calcd. For:  $\text{C}_{10}\text{H}_8\text{N}_2$ ; C: 76.90, H: 5.16, N: 17.94%, Found. C: 76.84, H: 5.10, N: 18.05%.

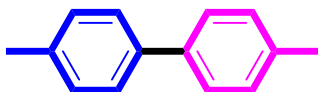

### 4,4'-Dimethylbiphenyl (C20):

Colorless crystals, mp = 118-120 °C.  $^1\text{H}$  NMR (250 MHz,  $\text{CDCl}_3$ )  $\delta$ : 7.40 (d,  $J$ = 6.3 Hz, 4H), 7.11 (d,  $J$ = 6.3 Hz, 4H), 2.33 (s, 6H) ppm;  $^{13}\text{C}$  NMR (63 MHz,  $\text{CDCl}_3$ )  $\delta$ : 141.6, 136.7, 129.8, 129.3, 127.0, 126.5, 19.8 ppm; Anal. Calcd. For:  $\text{C}_{14}\text{H}_{14}$ ; C: 92.26, H: 7.74%, Found. C: 92.35, H: 7.64%.

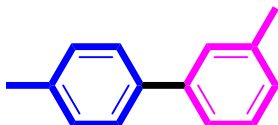

### 3,4'-Dimethylbiphenyl (C21):

Colorless liquid;  $^1\text{H}$  NMR (250 MHz,  $\text{CDCl}_3$ )  $\delta$ : 8.06 (s, 1H), 7.89 (d,  $J$ = 7.5 Hz, 2H), 7.55-7.47 (m, 5H), 2.47 (s, 3H), 2.28 (s, 3H) ppm;  $^{13}\text{C}$  NMR (63 MHz,  $\text{CDCl}_3$ )  $\delta$ : 158.4, 137.9, 130.9, 129.2, 129.0, 128.9, 127.0, 126.0, 123.3, 118.7, 30.3, 28.9 ppm; Anal. Calcd. For:  $\text{C}_{14}\text{H}_{14}$ ; C: 92.26, H: 7.74%, Found. C: 92.33, H: 7.67%.

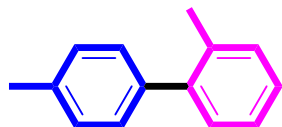

### 2,4'-Dimethylbiphenyl (C22):

Colorless liquid;  $^1\text{H NMR}$  (250 MHz,  $\text{CDCl}_3$ )  $\delta$ : 7.64 (dd,  $J = 7.5$  Hz,  $j = 2$  Hz, 2H), 7.46 (dd,  $J = 7.5$  Hz,  $j = 2$  Hz, 2H), 7.21 (m, 3H), 6.79 (s, 1H), 2.25 (s, 3H), 2.11 (s, 3H) ppm;  $^{13}\text{CNMR}$  (63 MHz,  $\text{CDCl}_3$ )  $\delta$ : 157.2, 134.1, 130.9, 128.8, 128.7, 126.2, 125.9, 125.8, 124.9, 120.5, 23.7, 22.3 ppm; Anal. Calcd. For:  $\text{C}_{14}\text{H}_{14}$ ; C: 92.26, H: 7.74%, Found. C: 92.30, H: 7.68%.

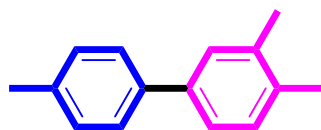

### 3,4,4'-Trimethylbiphenyl (C23):

Colorless crystals, mp = 75-77 °C.  $^1\text{H NMR}$  (250 MHz,  $\text{CDCl}_3$ )  $\delta$ : 7.25-7.18 (m, 2H), 7.00 (d,  $J = 6.3$  Hz, 2H), 6.92-6.87 (m,  $J = 6.3$  Hz, 3H), 2.33 (s, 3H), 2.32 (s, 3H), 2.13 (s, 3H) ppm;  $^{13}\text{CNMR}$  (63 MHz,  $\text{CDCl}_3$ )  $\delta$ : 155.5, 139.6, 133.6, 131.6, 129.1, 128.2, 126.5, 125.1, 122.3, 118.6, 29.1, 28.1, 21.3 ppm; Anal. Calcd. For:  $\text{C}_{15}\text{H}_{16}$ ; C: 91.78, H: 8.22%, Found. C: 91.83, H: 8.25%.

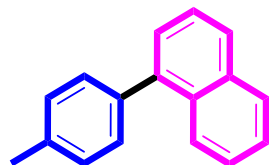

### 1-(4-Methylphenyl)naphthalene (C24):

Colorless crystals, mp = 49-51 °C.  $^1\text{H NMR}$  (250 MHz,  $\text{CDCl}_3$ )  $\delta$ : 7.84-7.93 (m, 3H), 7.29-7.53 (m, 8H), 2.46 (s, 3H) ppm;  $^{13}\text{CNMR}$  (62.9 MHz,  $\text{CDCl}_3$ )  $\delta$ : 140.3, 137.8, 136.9, 133.7, 131.7, 129.9, 129.0, 128.2, 127.4, 126.8, 126.1, 125.9, 125.7, 125.3, 21.2 ppm; Anal. Calcd. For:  $\text{C}_{17}\text{H}_{14}$ ; C: 93.54, H: 6.46%, Found. C: 93.39, H: 6.60%.

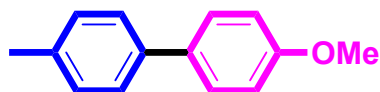

### 4-Methoxy-4'-methylbiphenyl (C25):

Colorless crystals, mp = 109-111 °C.  $^1\text{H NMR}$  (250 MHz,  $\text{CDCl}_3$ )  $\delta$ : 6.97 (d,  $J = 7.0$  Hz, 2H), 6.88 (d,  $J = 7.0$  Hz, 2H), 6.75-6.65 (m, 5H), 3.71 (s, 3H), 2.08 (s, 3H) ppm;  $^{13}\text{CNMR}$  (63 MHz,

CDCl<sub>3</sub>)  $\delta$ : 158.1, 138.1, 130.1, 127.7, 126.7, 125.0, 120.9, 117.2, 66.9, 24.3 ppm; Anal. Calcd. For: C<sub>14</sub>H<sub>14</sub>O; C: 84.81, H: 7.12%, Found. C: 84.78, H: 7.13%.

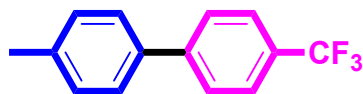

**4-Methyl-4'-(trifluoromethyl)biphenyl (C26):**

Colorless crystals, mp = 123-124 °C. <sup>1</sup>H NMR (250 MHz, CDCl<sub>3</sub>)  $\delta$ : 7.70 (s, 4H), 7.48 (d, *J* = 6.5 Hz, 2H), 7.27 (d, *J* = 9.2 Hz, 2H), 2.40 (s, 3H) ppm; <sup>13</sup>CNMR (63 MHz, CDCl<sub>3</sub>)  $\delta$ : 144.6, 138.0, 136.8, 129.4, 128.7, 128.4, 127.0, 125.6, 123.0, 21.1 ppm; Anal. Calcd. For: C<sub>14</sub>H<sub>11</sub>F<sub>3</sub>; C: 71.18, H: 4.69%, Found. C: 71.01, H: 4.55%.

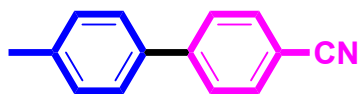

**4'-Methyl-4-biphenylcarbonitrile (C27):**

Colorless crystals, mp = 107-109 °C. <sup>1</sup>H NMR (250 MHz, CDCl<sub>3</sub>)  $\delta$ : 7.85 (d, *J* = 7.5 Hz, 2H), 7.66 (d, *J* = 7.5 Hz, 2H), 7.52-7.37 (m, 4H), 2.36 (s, 4H) ppm; <sup>13</sup>CNMR (63 MHz, CDCl<sub>3</sub>)  $\delta$ : 157.5, 146.3, 132.4, 130.9, 128.8, 127.8, 126.1, 124.4, 122.7, 107.0, 24.7 ppm; Anal. Calcd. For: C<sub>14</sub>H<sub>11</sub>N; C: 87.01, H: 5.74, N: 7.25%, Found. C: 86.92, H: 5.71, N: 7.27%.

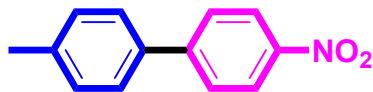

**4-Methyl-4'-nitrobiphenyl (C28):**

Light yellow crystals, mp = 139-140 °C. <sup>1</sup>H NMR (250 MHz, CDCl<sub>3</sub>)  $\delta$ : 8.22-8.18 (m, 2H), 7.57-7.52 (dd, *J* = 9.0 Hz, *j* = 1.7 Hz, 2H), 7.42-7.36 (m, 4H), 2.25 (s, 3H) ppm; <sup>13</sup>CNMR (63 MHz, CDCl<sub>3</sub>)  $\delta$ : 156.5, 143.7, 135.3, 131.9, 128.7, 128.5, 125.2, 117.7, 27.7 ppm; Anal. Calcd. For: C<sub>13</sub>H<sub>11</sub>NO<sub>2</sub>; C: 73.23, H: 5.20, N: 6.57, Found. C: 73.16, H: 5.16, N: 6.66 %.

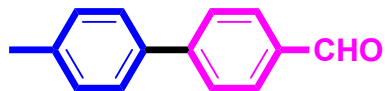

#### 4'-Methyl-4-biphenylcarbaldehyde (C29):

Colorless crystals, mp = 105-107 °C.  $^1\text{H}$  NMR (250 MHz,  $\text{CDCl}_3$ )  $\delta$ : 10.27 (s, 1H), 7.92-7.86 (m, 4H), 7.51-7.45 (m, 2H), 7.28 (dd,  $J=7.5$  Hz,  $j=2.0$  Hz, 2H), 2.06 (s, 3H) ppm;  $^{13}\text{C}$  NMR (63 MHz,  $\text{CDCl}_3$ )  $\delta$ : 200.2, 156.2, 142.8, 130.9, 128.7, 126.2, 125.9, 120.5, 22.3 ppm; Anal. Calcd. For:  $\text{C}_{14}\text{H}_{12}\text{O}$ ; C: 85.68, H: 6.16 %, Found. C: 85.61, H: 6.13 %.

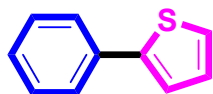

#### 2-Phenylthiophene (C30):

Colorless liquid;  $^1\text{H}$  NMR (250 MHz,  $\text{CDCl}_3$ )  $\delta$ : 7.30-7.22 (m, 5H), 7.15-6.85 (m, 2H), 6.83 (s, 4H) ppm;  $^{13}\text{C}$  NMR (63 MHz,  $\text{CDCl}_3$ )  $\delta$ : 155.7, 143.5, 127.5, 127.3, 127.2, 123.8, 119.7, 107.0 ppm; Anal. Calcd. For:  $\text{C}_{10}\text{H}_8\text{S}$ ; C: 74.96, H: 5.03, S: 20.01%, Found. C: 74.91, H: 5.01, S: 20.08%.

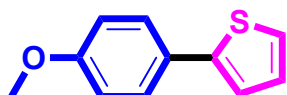

#### 2-(4-Methoxyphenyl)thiophene (C31):

Colorless crystals, mp = 105-107 °C.  $^1\text{H}$  NMR (250 MHz,  $\text{CDCl}_3$ )  $\delta$ : 7.53 (d,  $J=4.7$  Hz, 2H), 7.20-7.26 (m, 2H), 6.91-7.06 (m, 3H), 3.83 (s, 3H) ppm;  $^{13}\text{C}$  NMR (63 MHz,  $\text{CDCl}_3$ )  $\delta$ : 159.1, 143.9, 127.8, 127.4, 127.2, 123.8, 122.0, 114.1, 55.4 ppm; Anal. Calcd. For:  $\text{C}_{11}\text{H}_{10}\text{OS}$ ; C: 69.44, H: 5.30, S: 16.85 %, Found. C: 69.51, H: 5.39, S: 16.90 %.

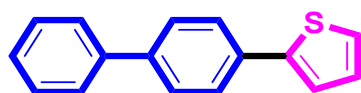

#### 2-(Biphenyl-4-yl)thiophene (C32):

Colorless crystals, mp = 171-173 °C.  $^1\text{H}$  NMR (250 MHz,  $\text{CDCl}_3$ )  $\delta$ : 7.54-7.59 (m, 5H), 7.32-7.49 (m, 7H) ppm;  $^{13}\text{C}$  NMR (63 MHz,  $\text{CDCl}_3$ ):  $\delta$ : 150.1, 142.4, 141.3, 133.1, 129.6, 128.8, 128.3, 128.0, 127.8, 127.5 ppm; Anal. Calcd. for  $\text{C}_{16}\text{H}_{12}\text{S}$ ; C: 81.32, H: 5.12, S: 13.57%, Found: C: 81.21, H: 5.07, S: 13.73%.

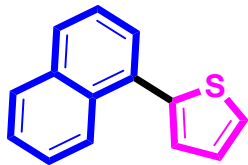

**2-(Naphthalen-1-yl)thiophene (C33):**

Colorless liquid;  $^1\text{H}$  NMR (250 MHz,  $\text{CDCl}_3$ )  $\delta$ : 8.22-8.25 (m, 1H), 7.84-7.97 (m, 2H), 7.44-7.58 (m, 3H), 7.18-7.32 (m, 4H) ppm;  $^{13}\text{C}$  NMR (63 MHz,  $\text{CDCl}_3$ )  $\delta$ : 141.1, 133.25, 132.0, 131.5, 129.3, 128.7, 127.5, 127.2, 126.8, 126.7, 125.8, 125.2 ppm; Anal. Calcd. for  $\text{C}_{14}\text{H}_{10}\text{S}$ ; C: 79.96, H: 4.79, S: 15.25%, Found: C: 79.89, H: 4.77, S: 15.34%.

### 3 NMR Spectra of Compounds:

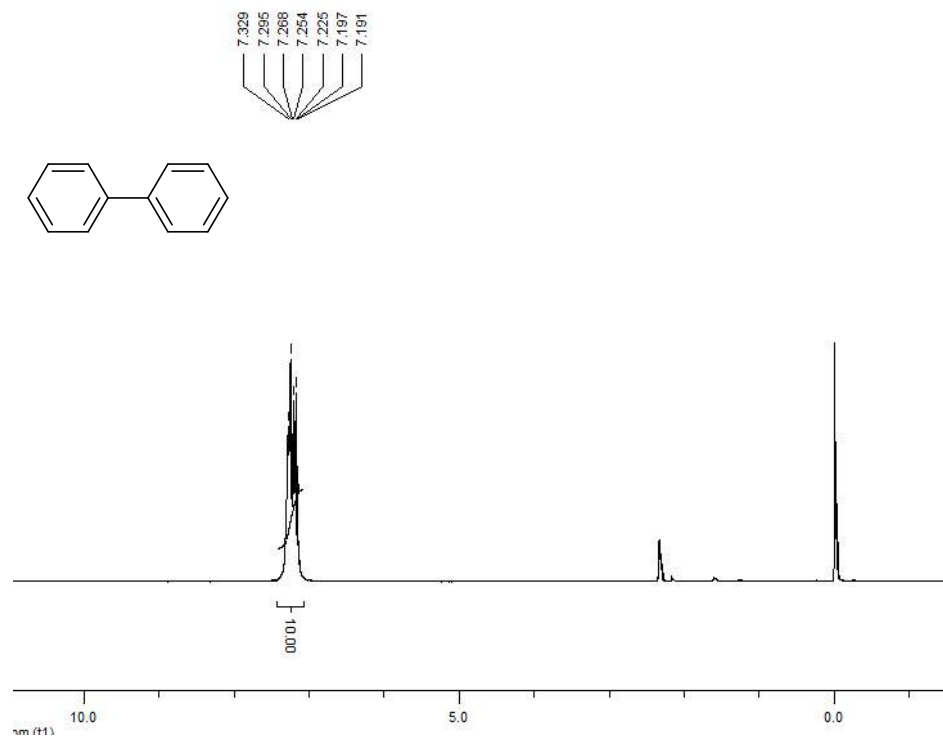

**Scheme S1.** <sup>1</sup>H-NMR spectra (250 MHz) of biphenyl (C1) in CDCl<sub>3</sub>.

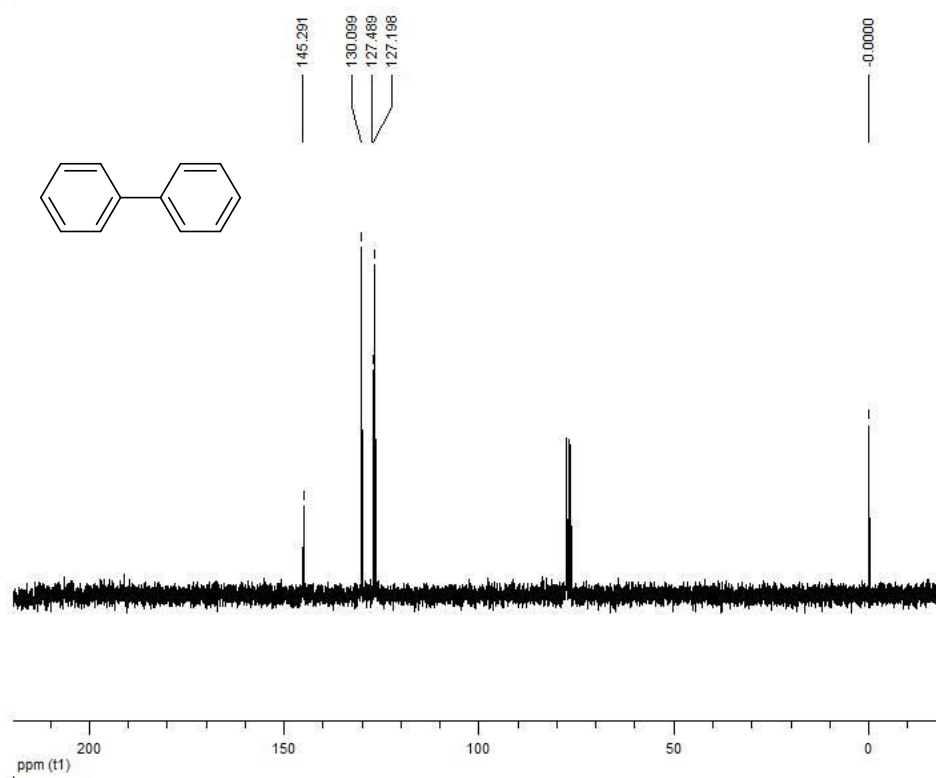

**Scheme S2.** <sup>13</sup>C-NMR spectra (63 MHz) of biphenyl (C1) in CDCl<sub>3</sub>.

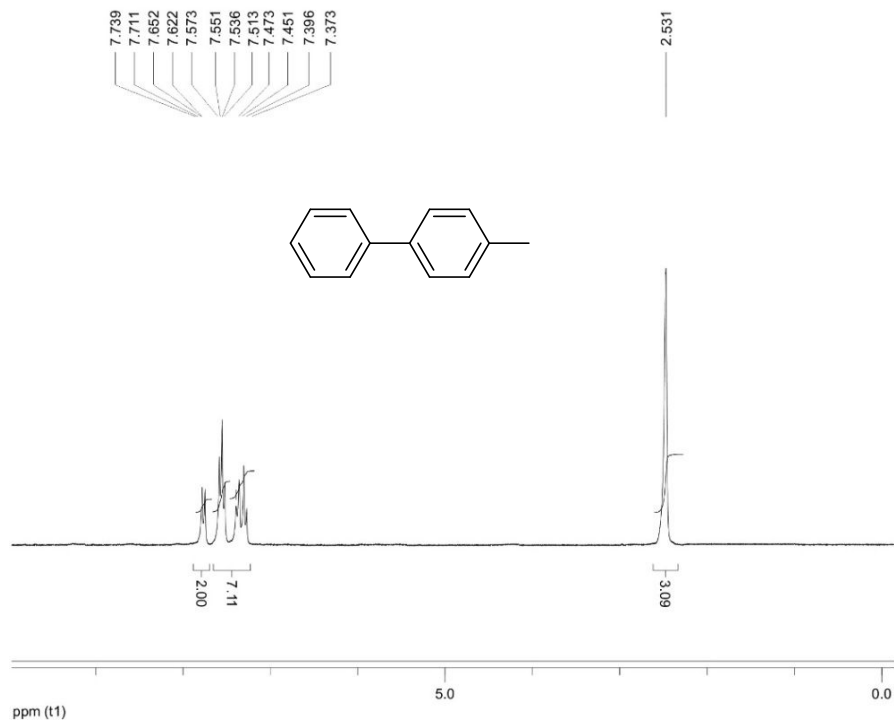

**Scheme S3.** <sup>1</sup>H-NMR spectra (250 MHz) of 4-methylbiphenyl (**C2** and **C19**) in CDCl<sub>3</sub>.

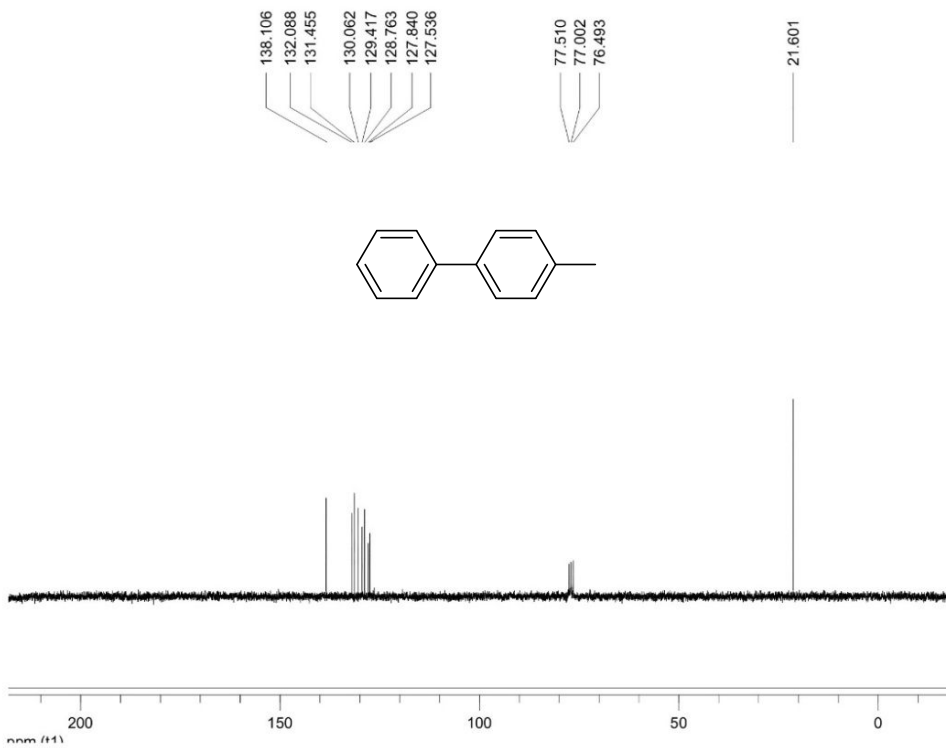

**Scheme S4.** <sup>13</sup>C-NMR spectra (63 MHz) of 4-methylbiphenyl (**C2** and **C19**) in CDCl<sub>3</sub>.

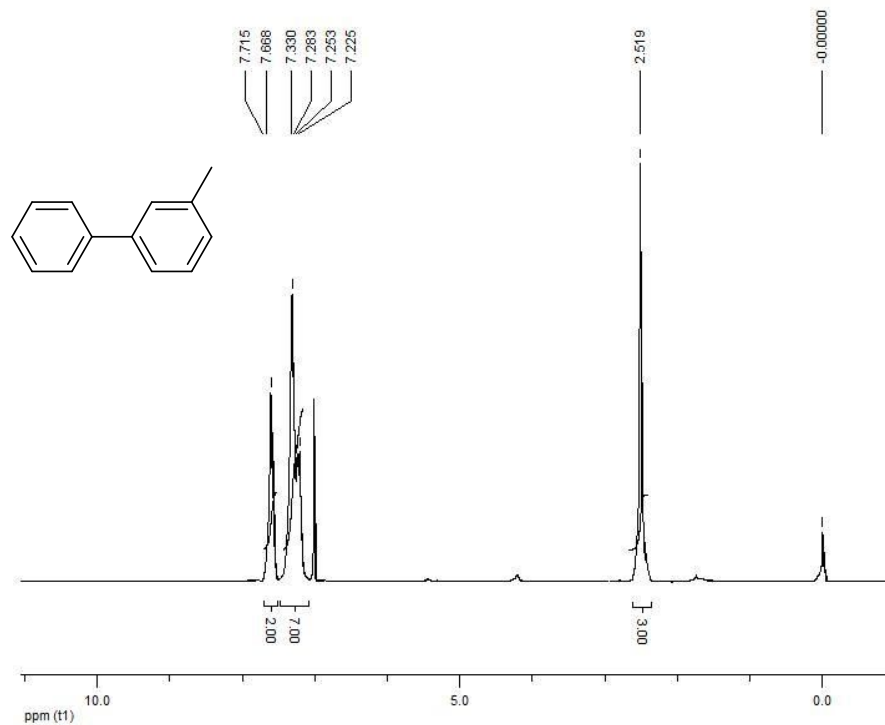

**Scheme S5.** <sup>1</sup>H-NMR spectra (250 MHz) of 3-methylbiphenyl (**C3**) in CDCl<sub>3</sub>.

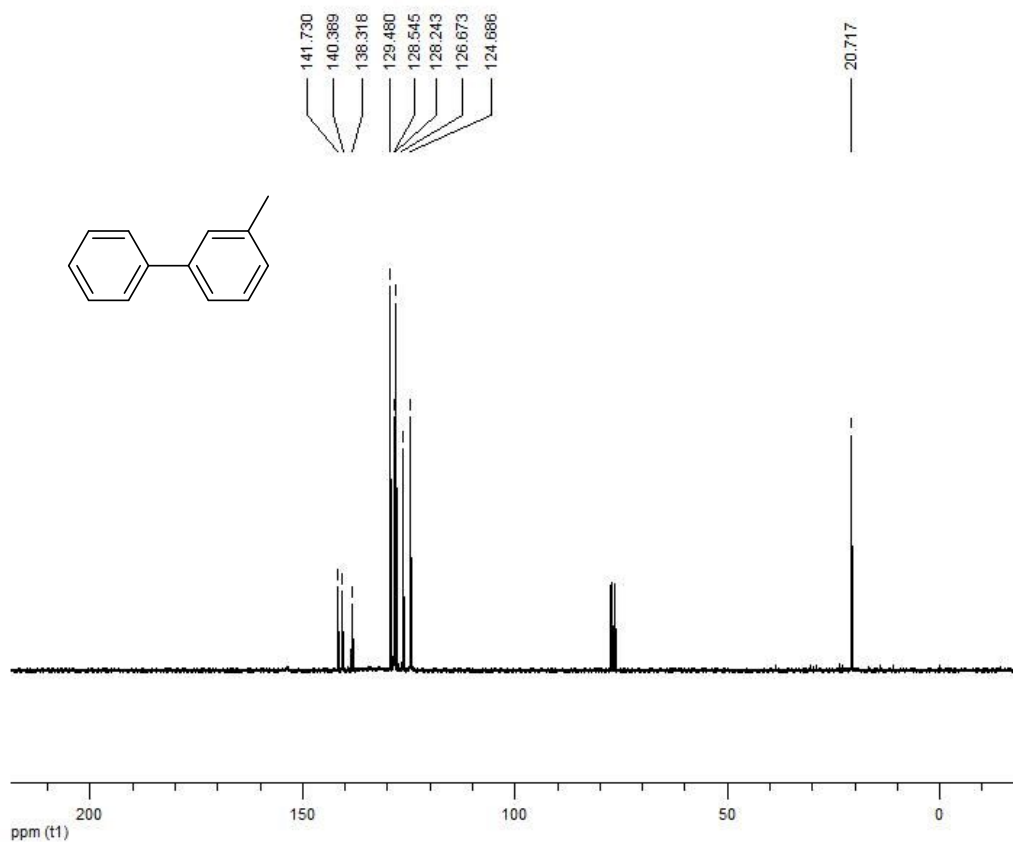

**Scheme S6.** <sup>13</sup>C-NMR spectra (63 MHz) of 3-methylbiphenyl (**C3**) in CDCl<sub>3</sub>.



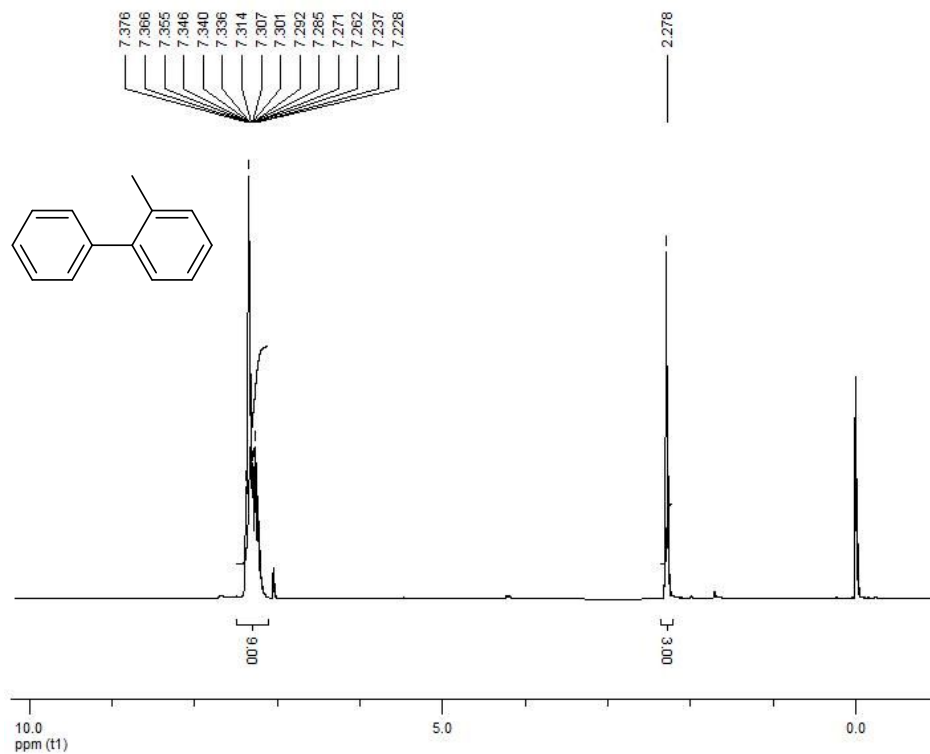

**Scheme S7.** <sup>1</sup>H-NMR spectra (250 MHz) of 2-methylbiphenyl (**C4**) in CDCl<sub>3</sub>.

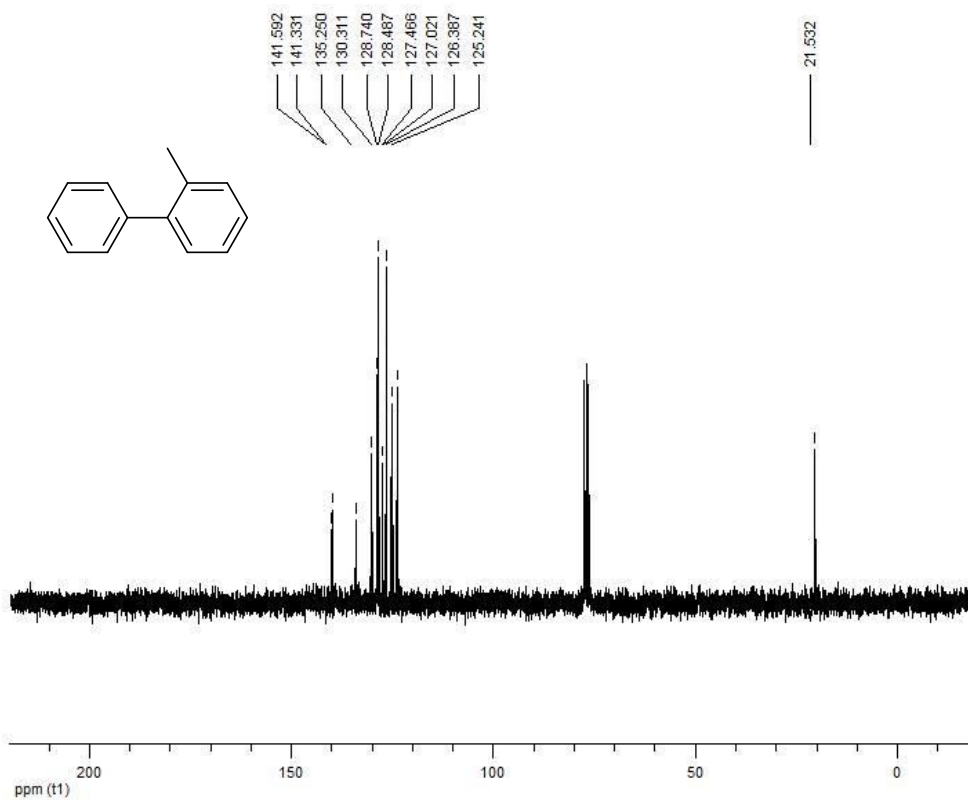

**Scheme S8.** <sup>13</sup>C-NMR spectra (63 MHz) of 2-methylbiphenyl (**C4**) in CDCl<sub>3</sub>.

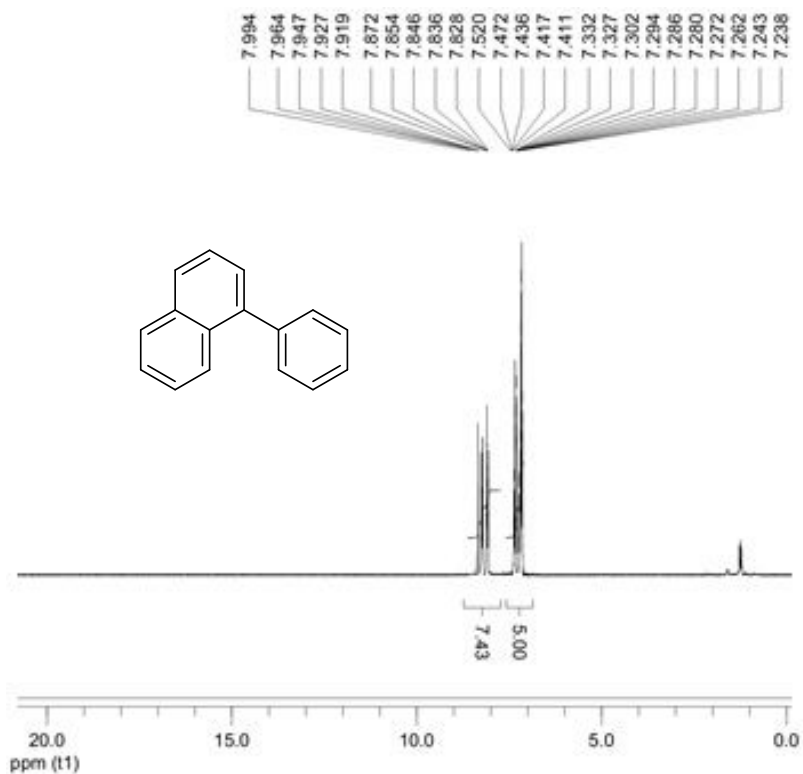

**Scheme S9.** <sup>1</sup>H-NMR spectra (250 MHz) of 1-phenylnaphthalene (C5) in CDCl<sub>3</sub>.

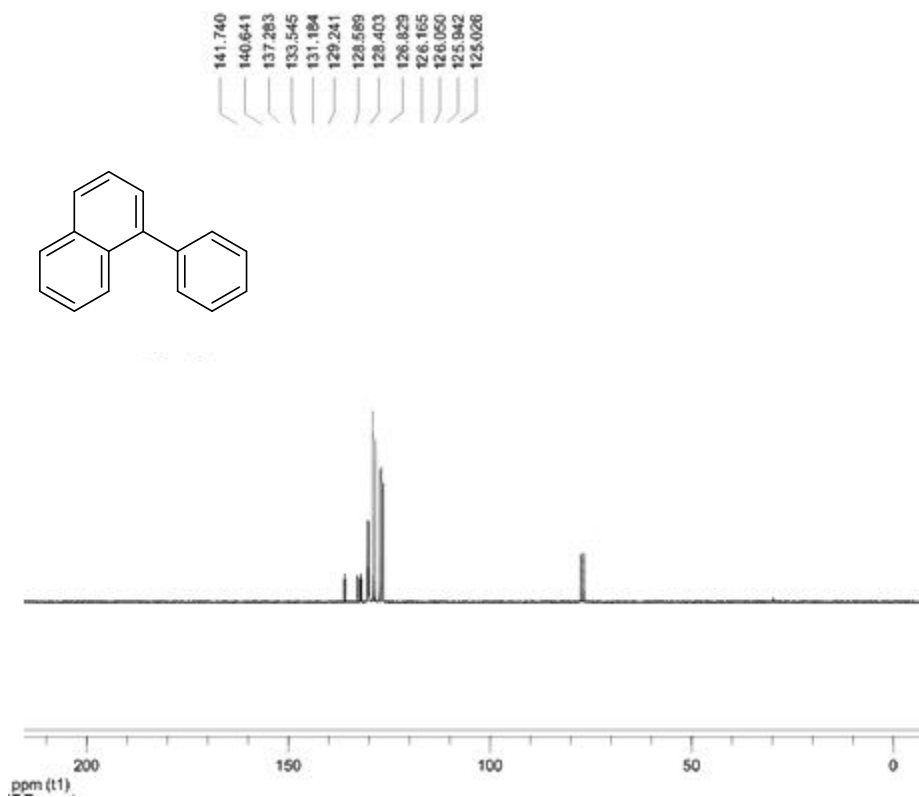

**Scheme S10.** <sup>13</sup>C-NMR spectra (63 MHz) of 1-phenylnaphthalene (C5) in CDCl<sub>3</sub>.

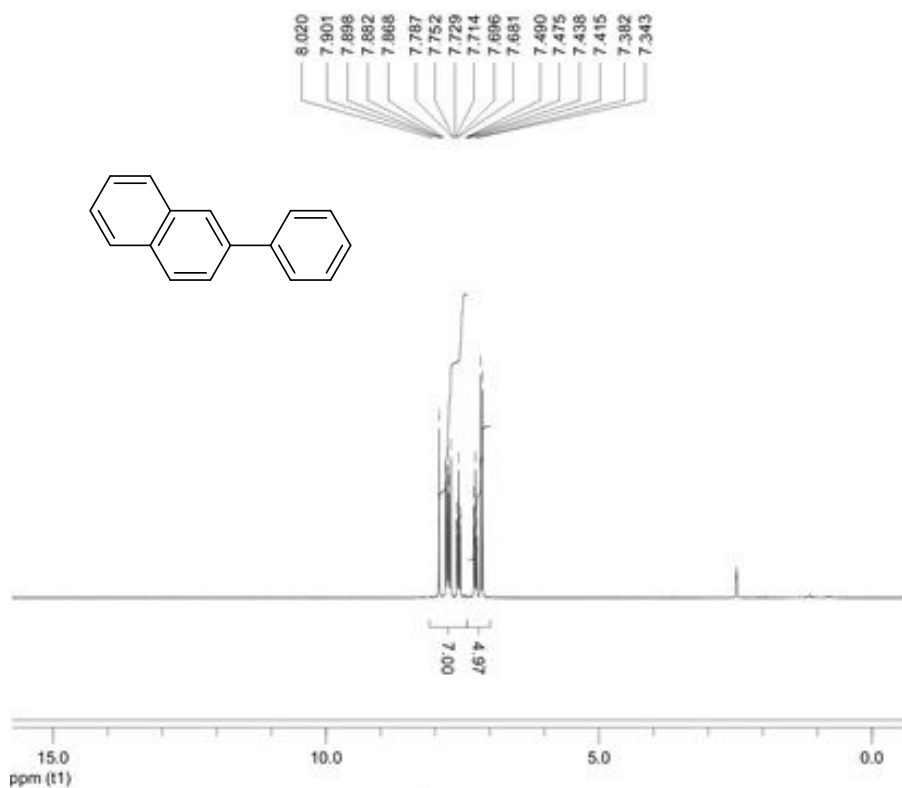

**Scheme S11.**  $^1\text{H-NMR}$  spectra (250 MHz) of 2-phenylnaphthalene (**C6**) in  $\text{CDCl}_3$ .

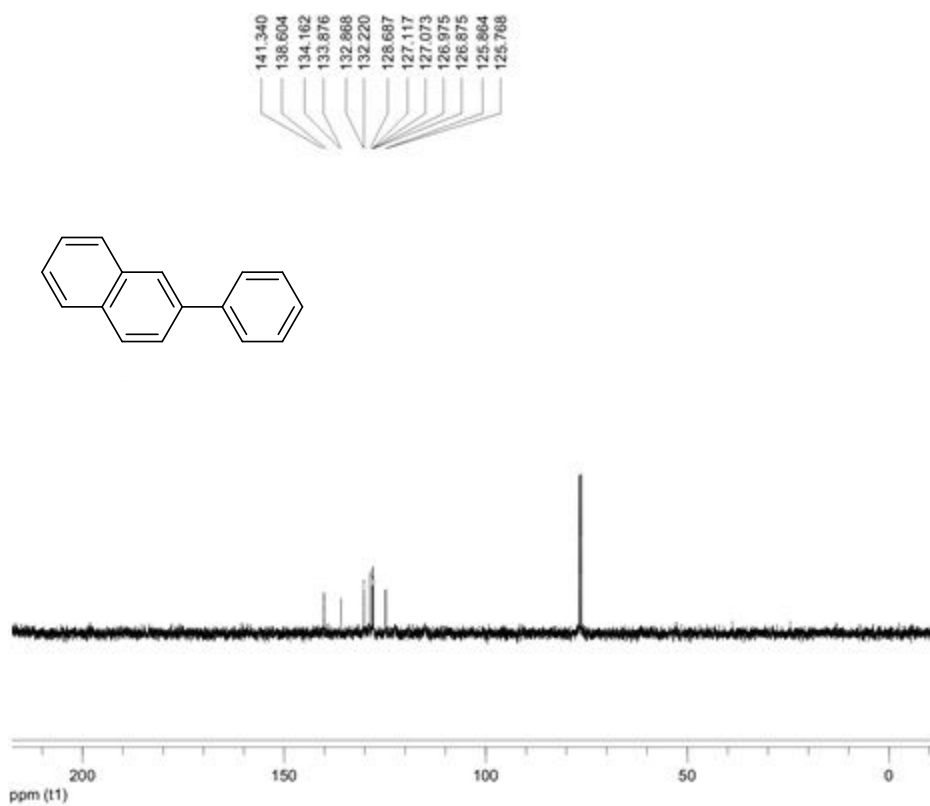

**Scheme S12.**  $^{13}\text{C-NMR}$  spectra (63 MHz) of 2-phenylnaphthalene (**C6**) in  $\text{CDCl}_3$ .

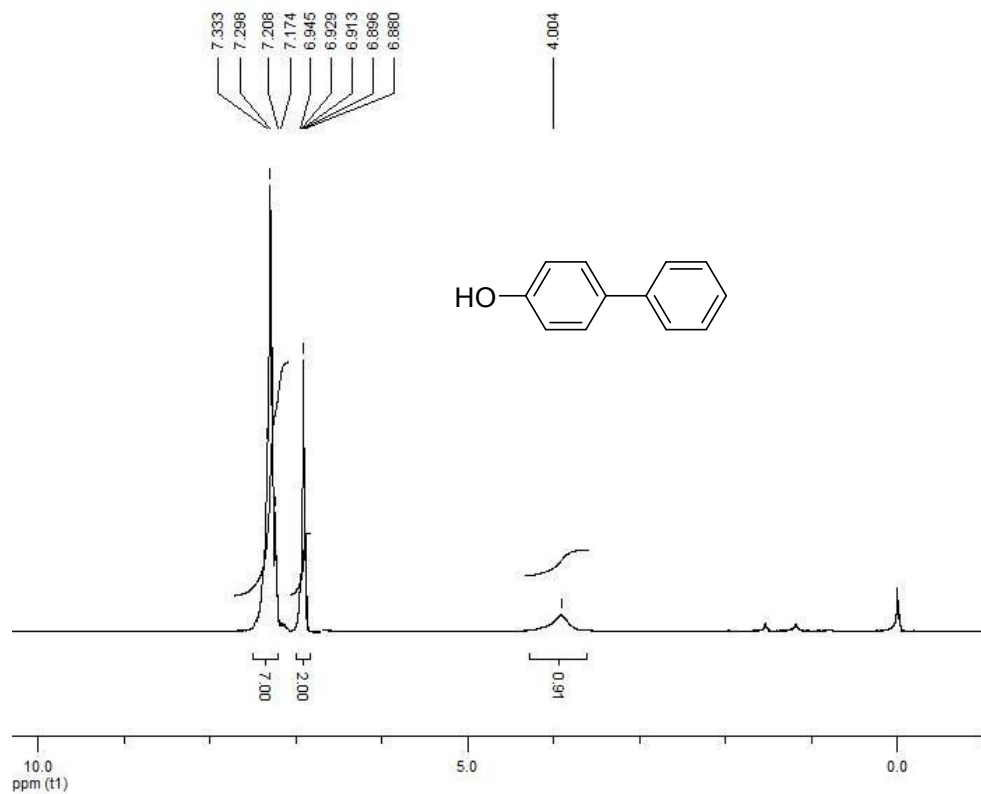

**Scheme S13.** <sup>1</sup>H-NMR spectra (250 MHz) of biphenyl-4-ol (C7) in CDCl<sub>3</sub>.

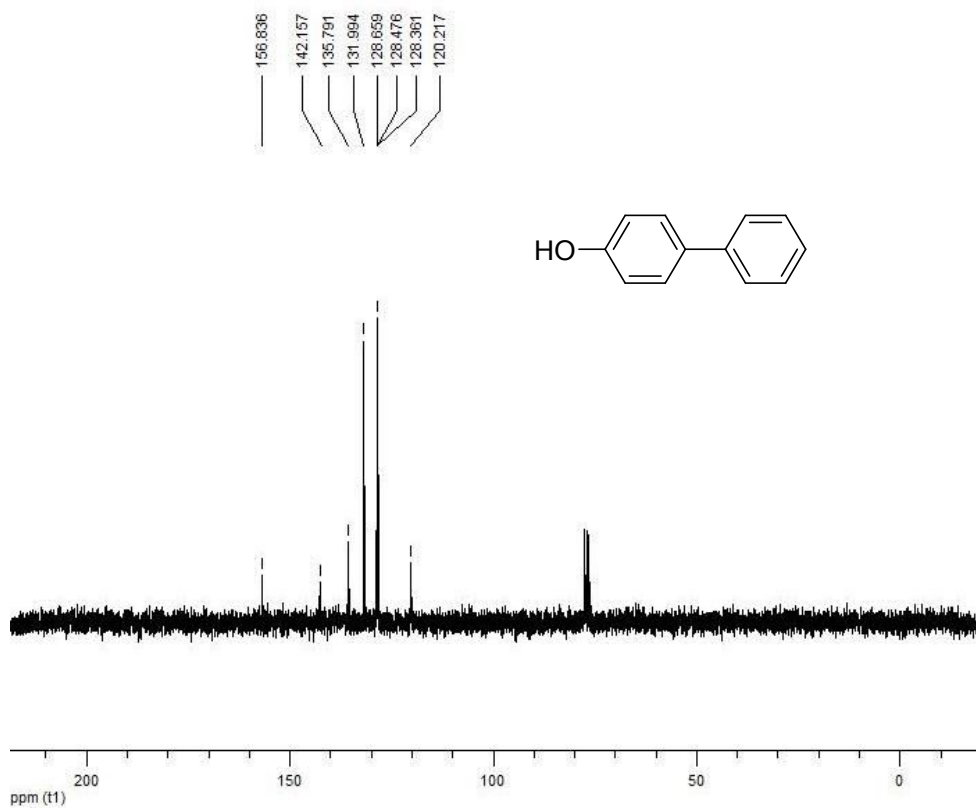

**Scheme S14.** <sup>13</sup>C-NMR spectra (63 MHz) of biphenyl-4-ol (C7) in CDCl<sub>3</sub>.

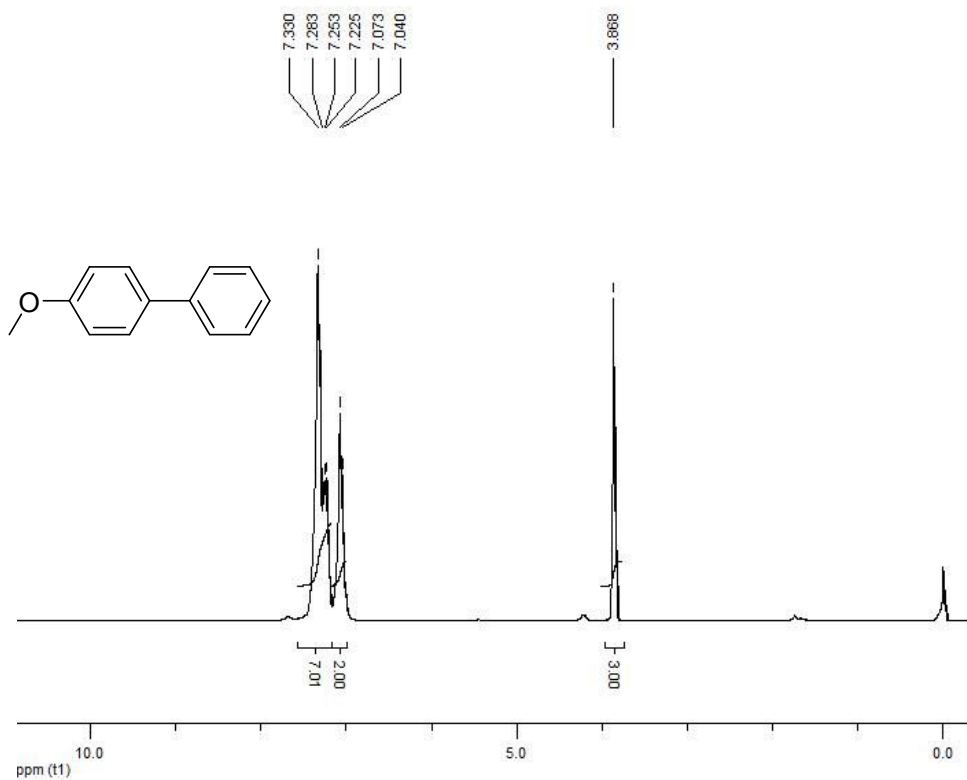

**Scheme S15.** <sup>1</sup>H-NMR spectra (250 MHz) of 4-methoxybiphenyl (**C8**) in CDCl<sub>3</sub>.

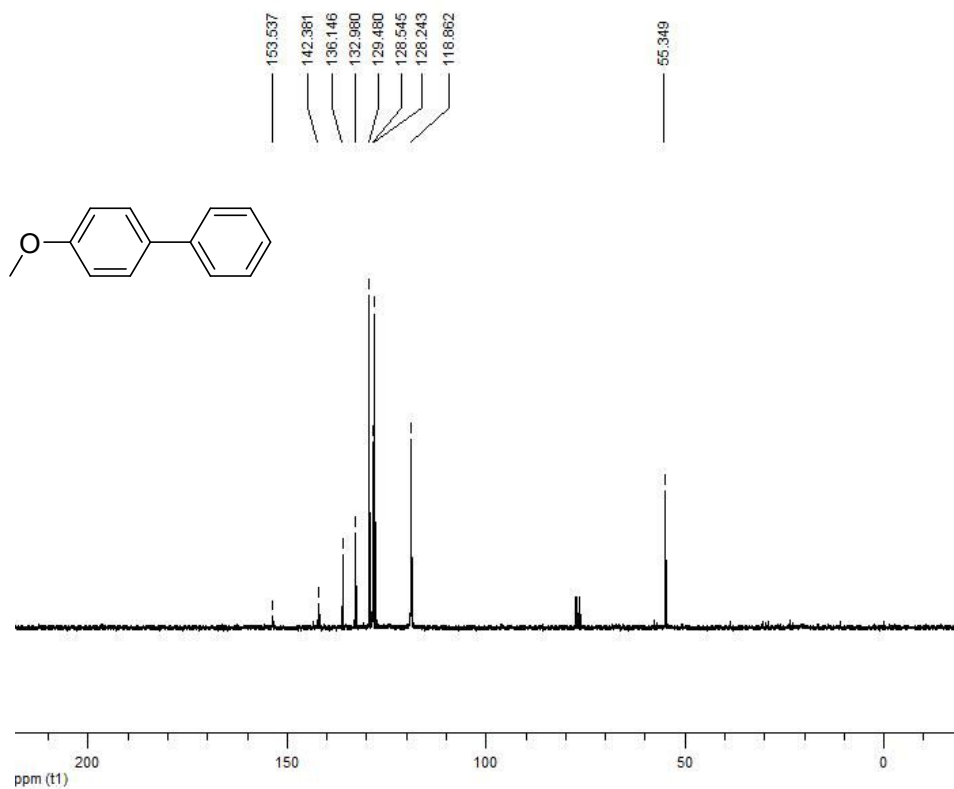

**Scheme S16.** <sup>13</sup>C-NMR spectra (63 MHz) of 4-methoxybiphenyl (**C8**) in CDCl<sub>3</sub>.

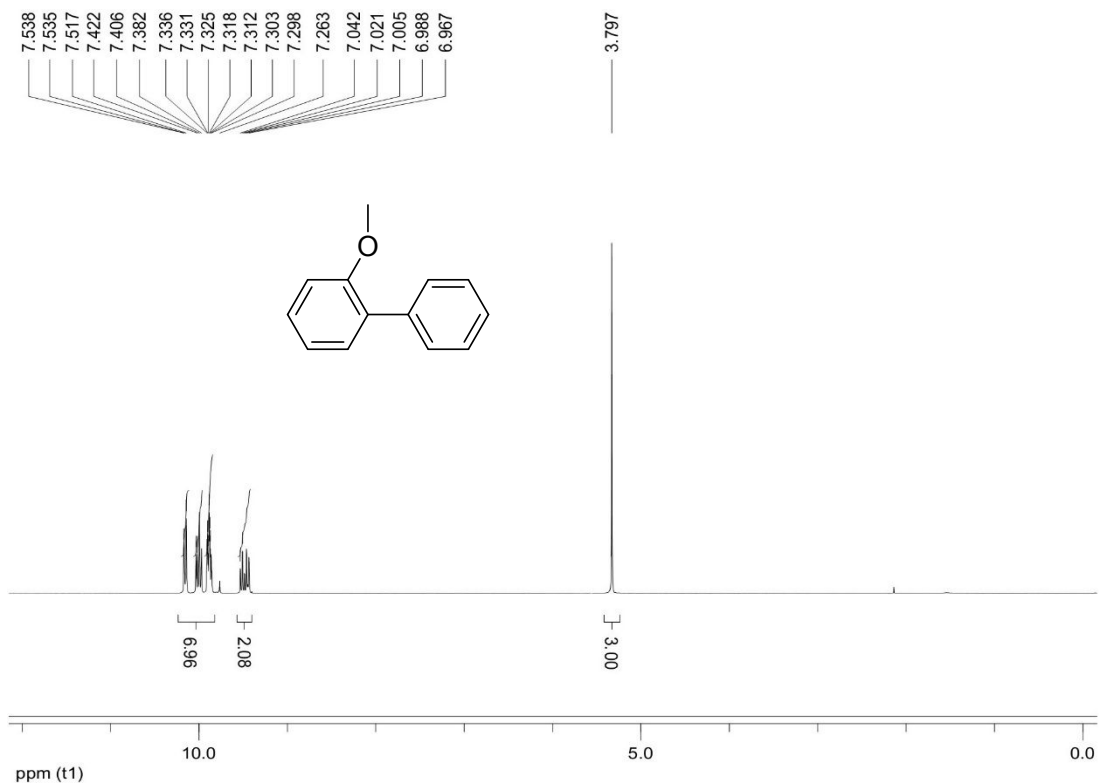

**Scheme S17.** <sup>1</sup>H-NMR spectra (250 MHz) of 2-methoxybiphenyl (**C9**) in CDCl<sub>3</sub>.

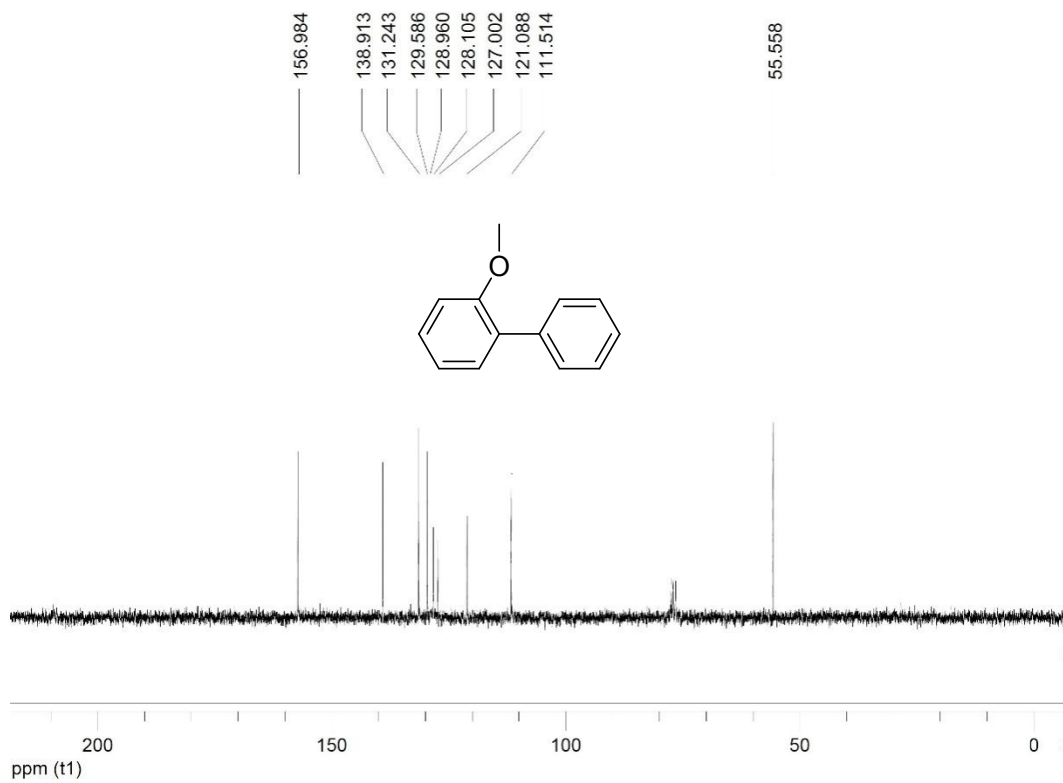

**Scheme S18.** <sup>13</sup>C-NMR spectra (63 MHz) of 2-methoxybiphenyl (**C9**) in CDCl<sub>3</sub>.

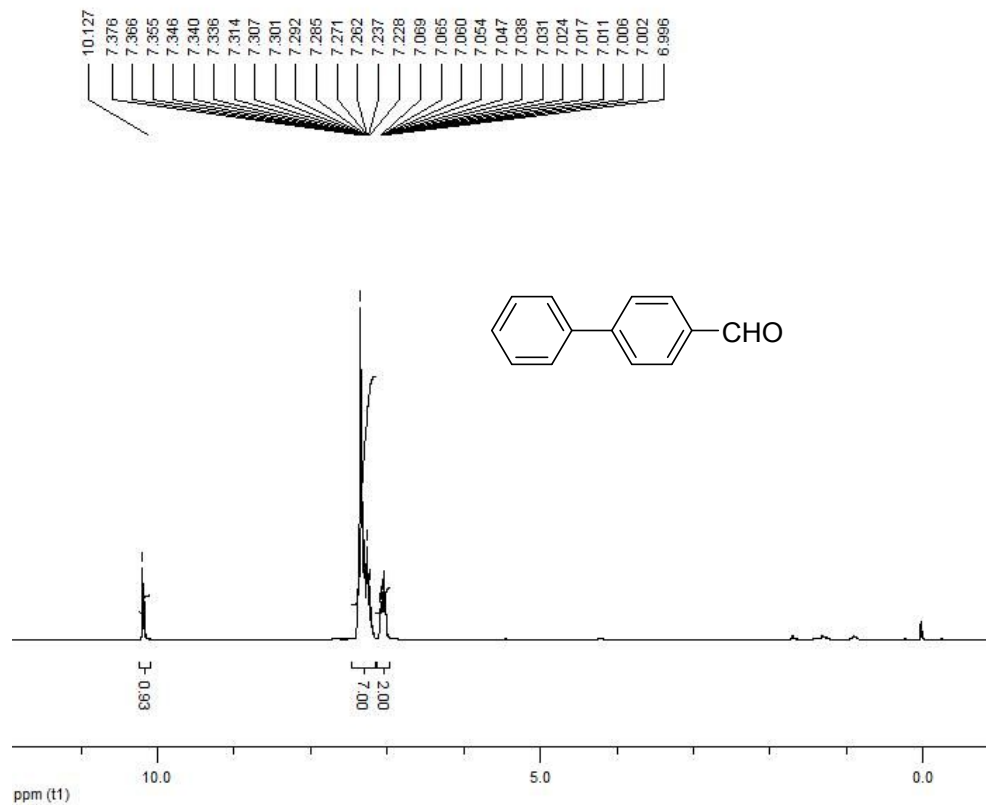

**Scheme S19.** <sup>1</sup>H-NMR spectra (250 MHz) of 4-biphenylcarbaldehyde (**C10**) in CDCl<sub>3</sub>.

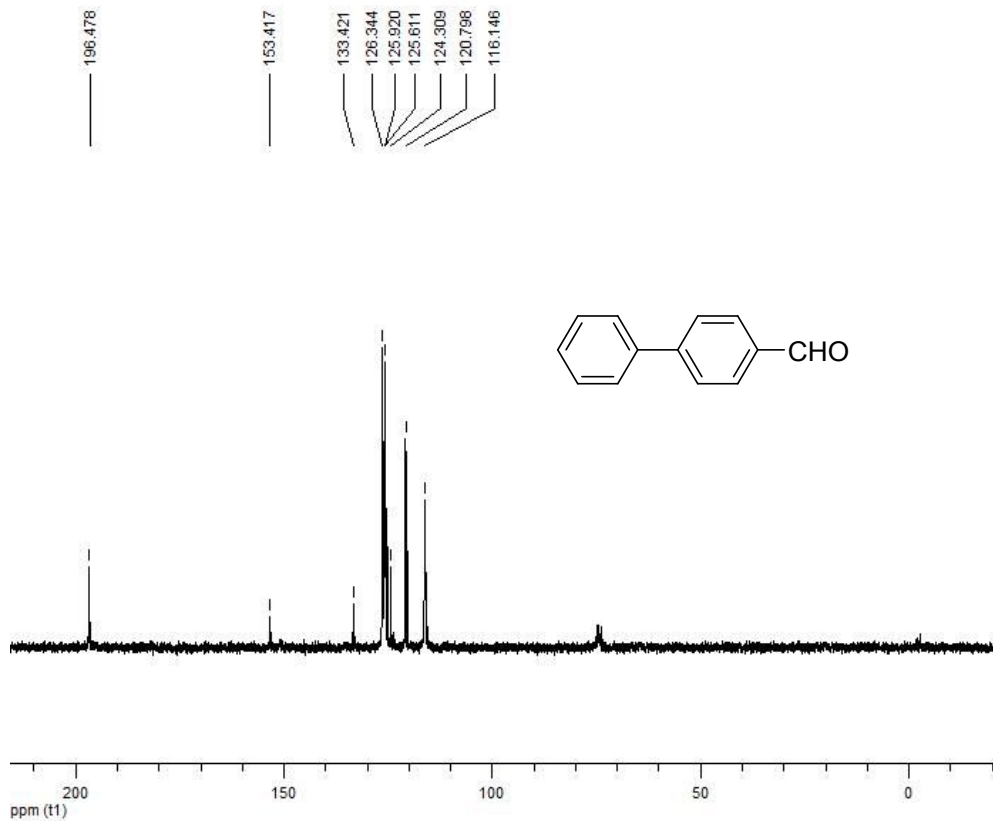

**Scheme S20.** <sup>13</sup>C-NMR spectra (63 MHz) of 4-biphenylcarbaldehyde (**C10**) in CDCl<sub>3</sub>.

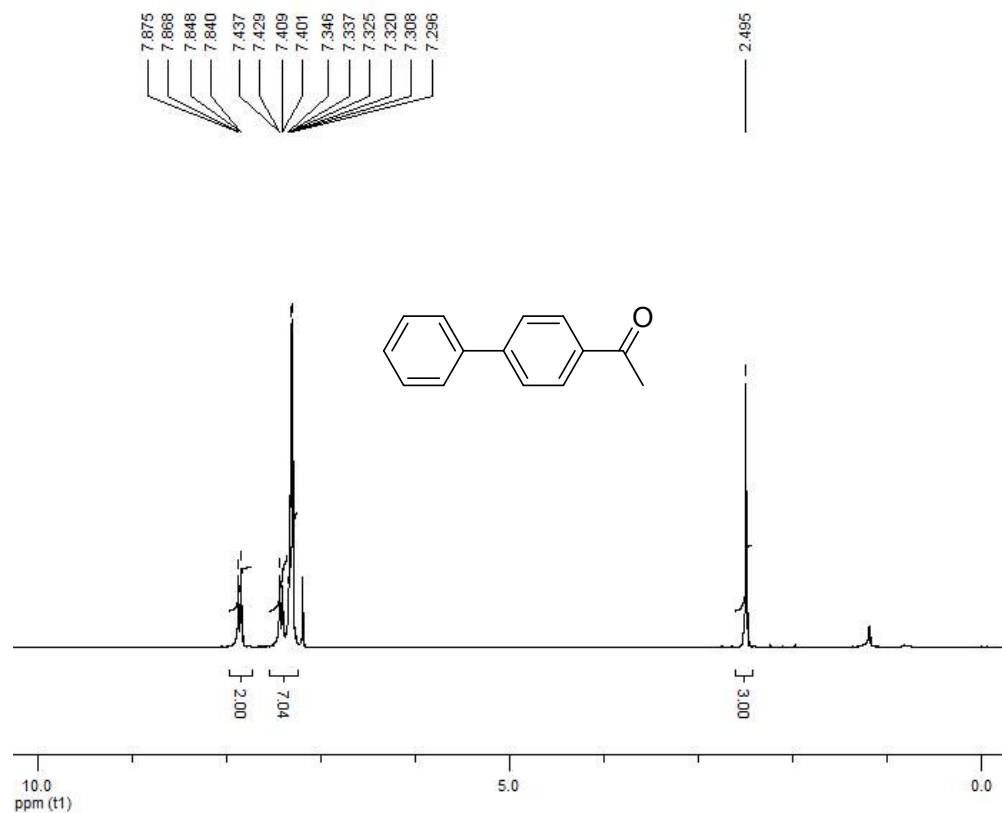

**Scheme S21.** <sup>1</sup>H-NMR spectra (250 MHz) of 1-(4-biphenyl)ethanone (C11) in CDCl<sub>3</sub>.

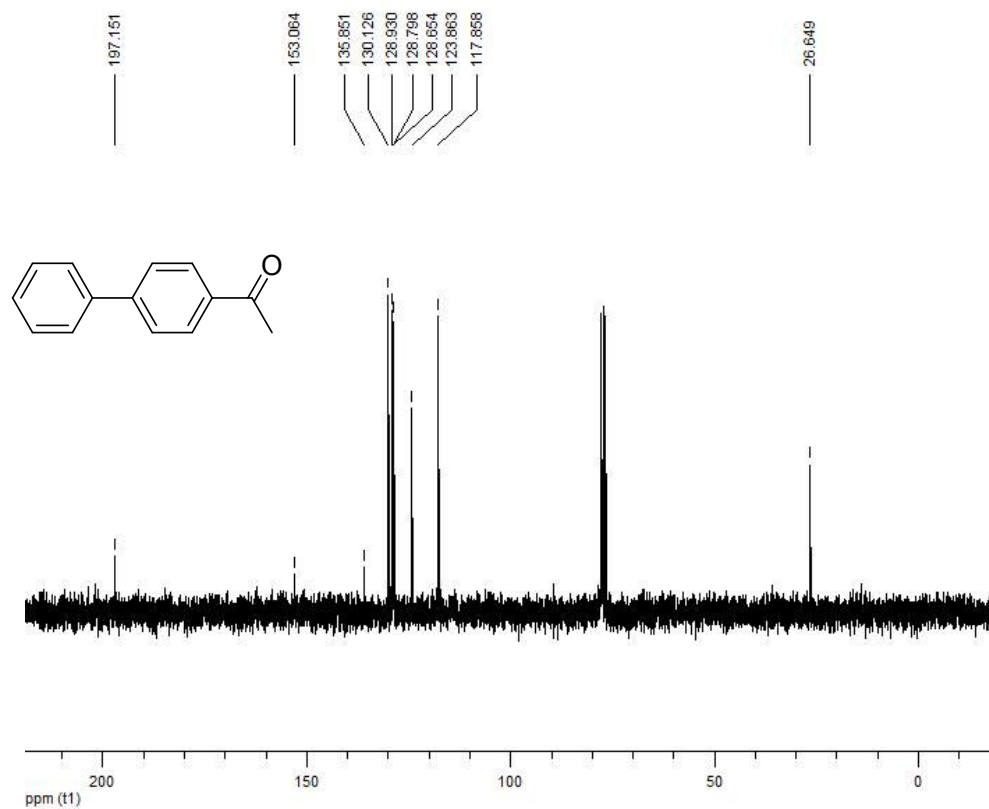

**Scheme S22.** <sup>13</sup>C-NMR spectra (63 MHz) of 1-(4-biphenyl)ethanone (C11) in CDCl<sub>3</sub>.



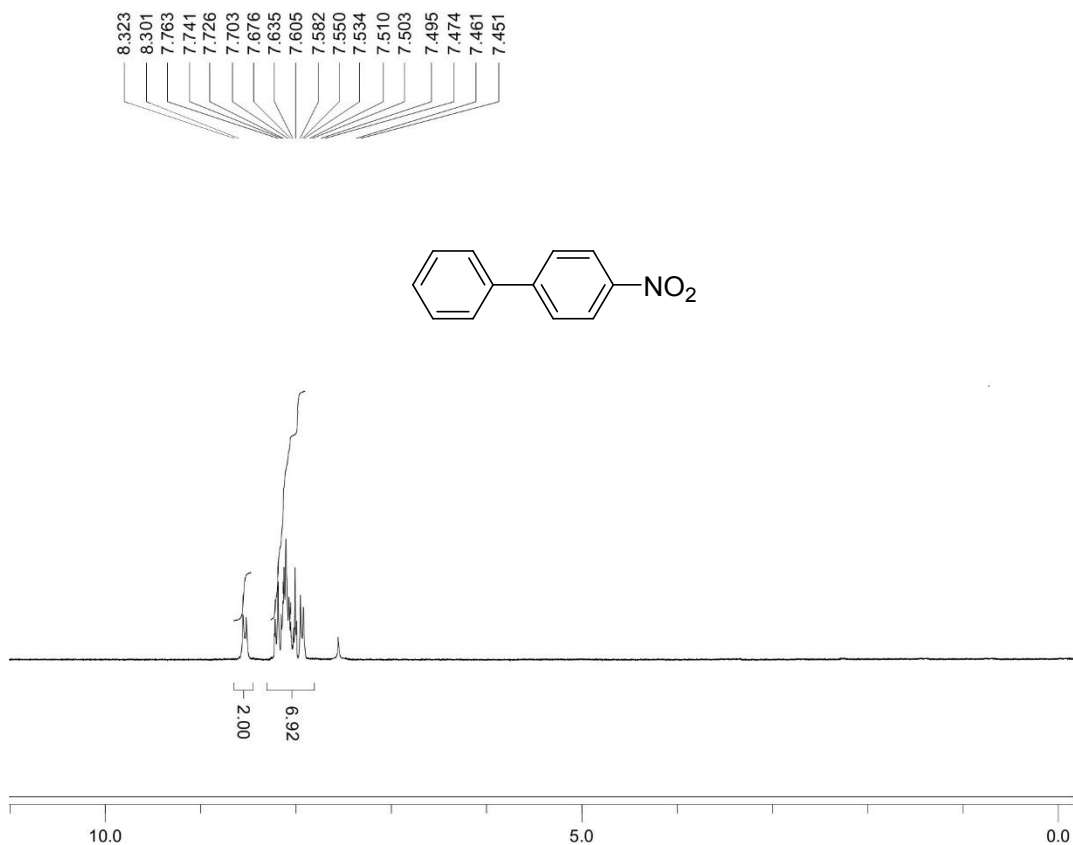

**Scheme S23.** <sup>1</sup>H-NMR spectra (250 MHz) of 4-nitrobiphenyl (C12) in CDCl<sub>3</sub>.

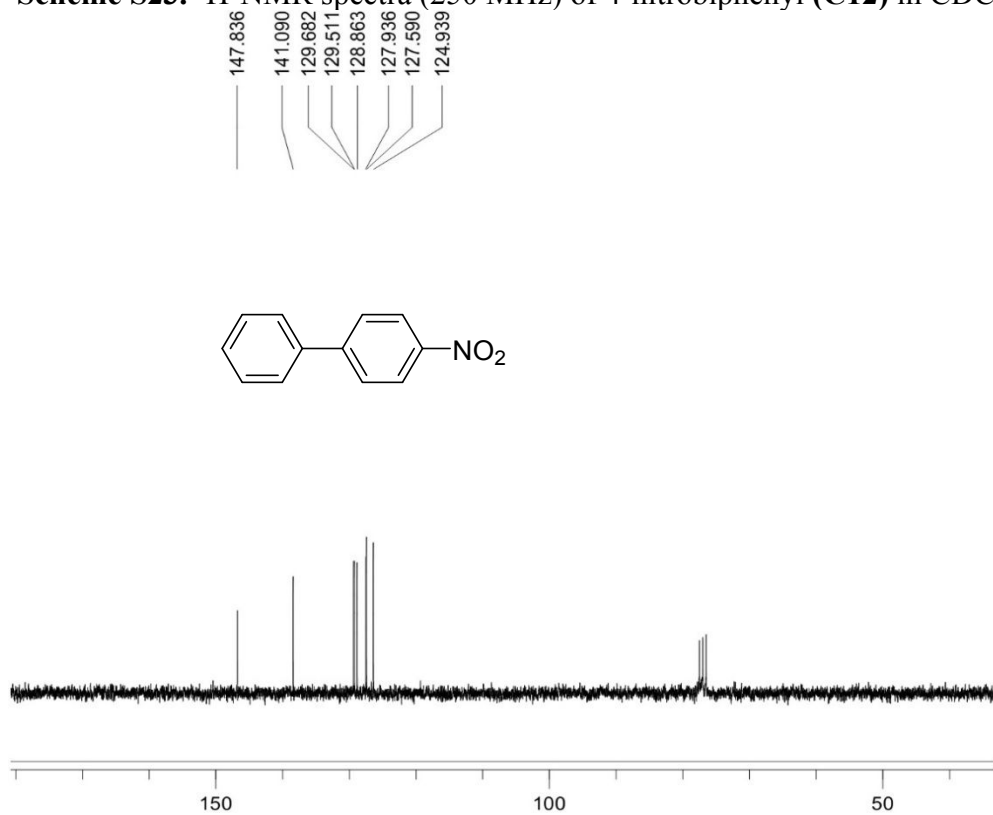

**Scheme S24.** <sup>13</sup>C-NMR spectra (63 MHz) of 4-nitrobiphenyl (C12) in CDCl<sub>3</sub>.

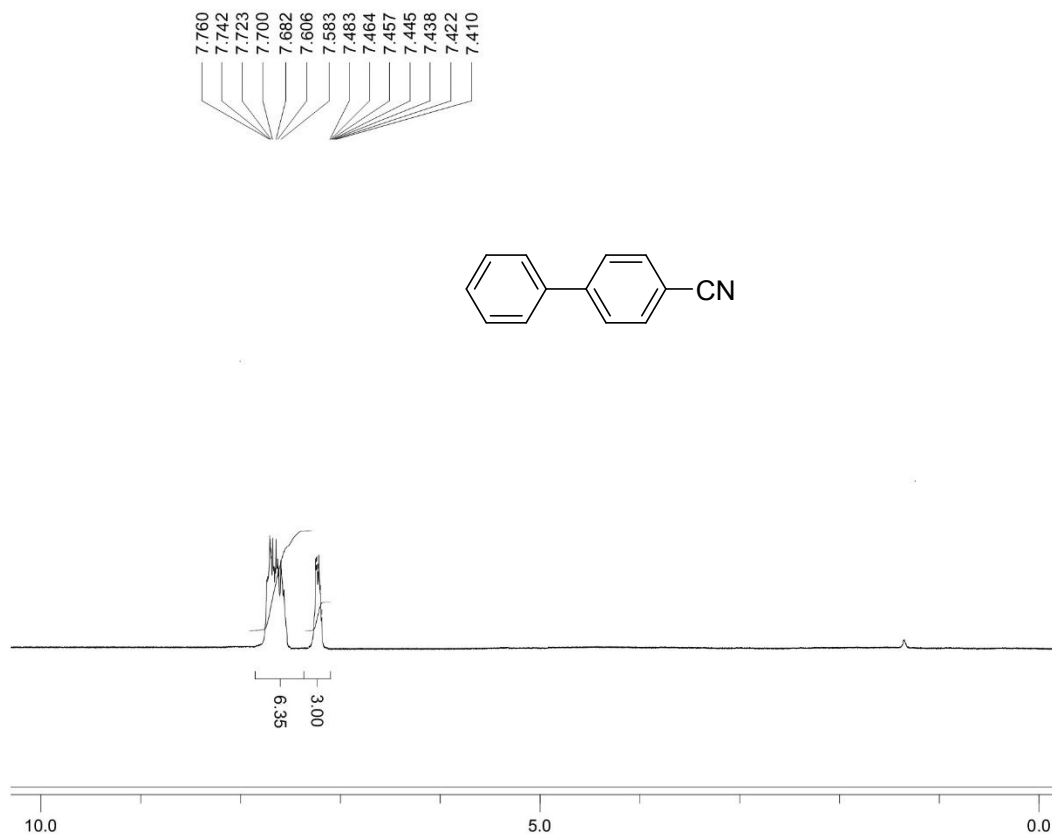

**Scheme S25.**  $^1\text{H-NMR}$  spectra (250 MHz) of 4-biphenylcarbonitrile (**C13**) in  $\text{CDCl}_3$ .

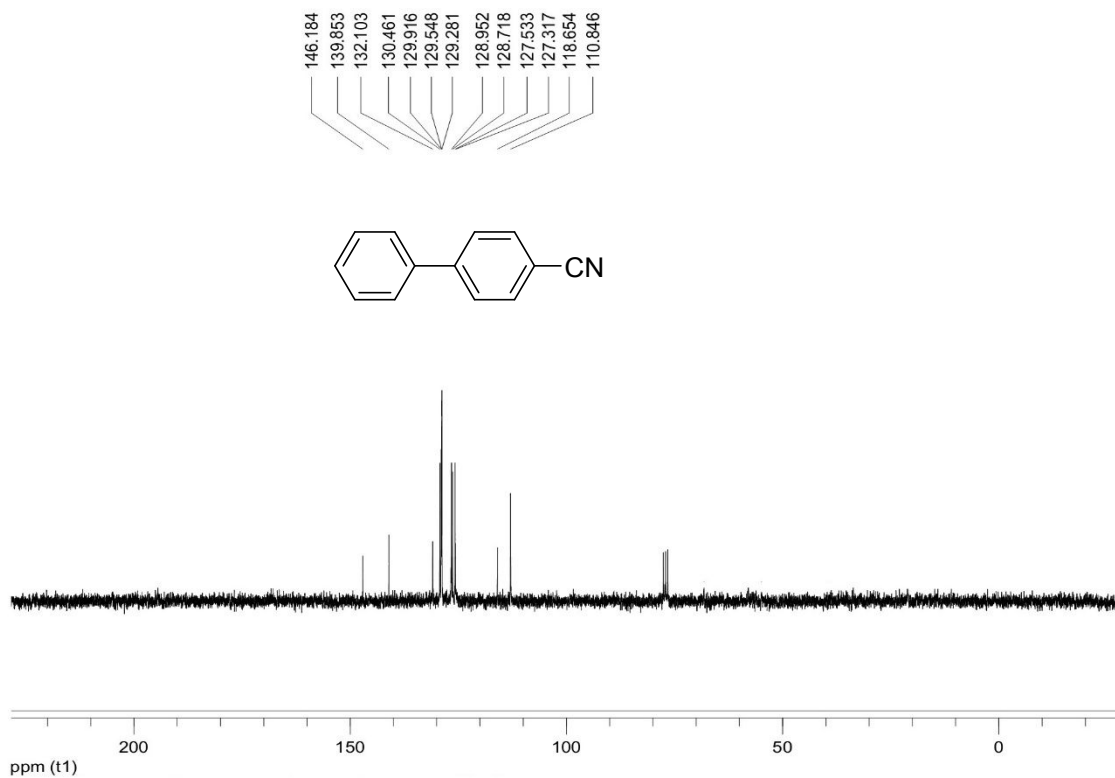

**Scheme S26.**  $^{13}\text{C-NMR}$  spectra (63 MHz) of 4-biphenylcarbonitrile (**C13**) in  $\text{CDCl}_3$ .

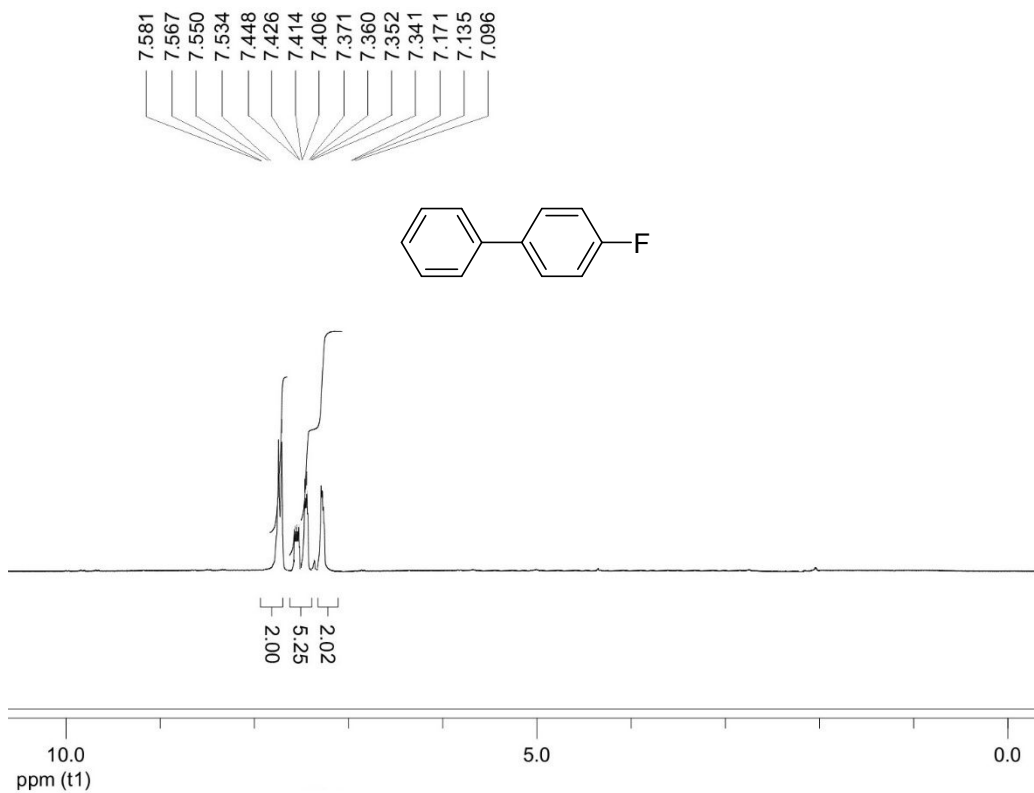

**Scheme S27.** <sup>1</sup>H-NMR spectra (250 MHz) of 4-fluorobiphenyl (C14) in CDCl<sub>3</sub>.

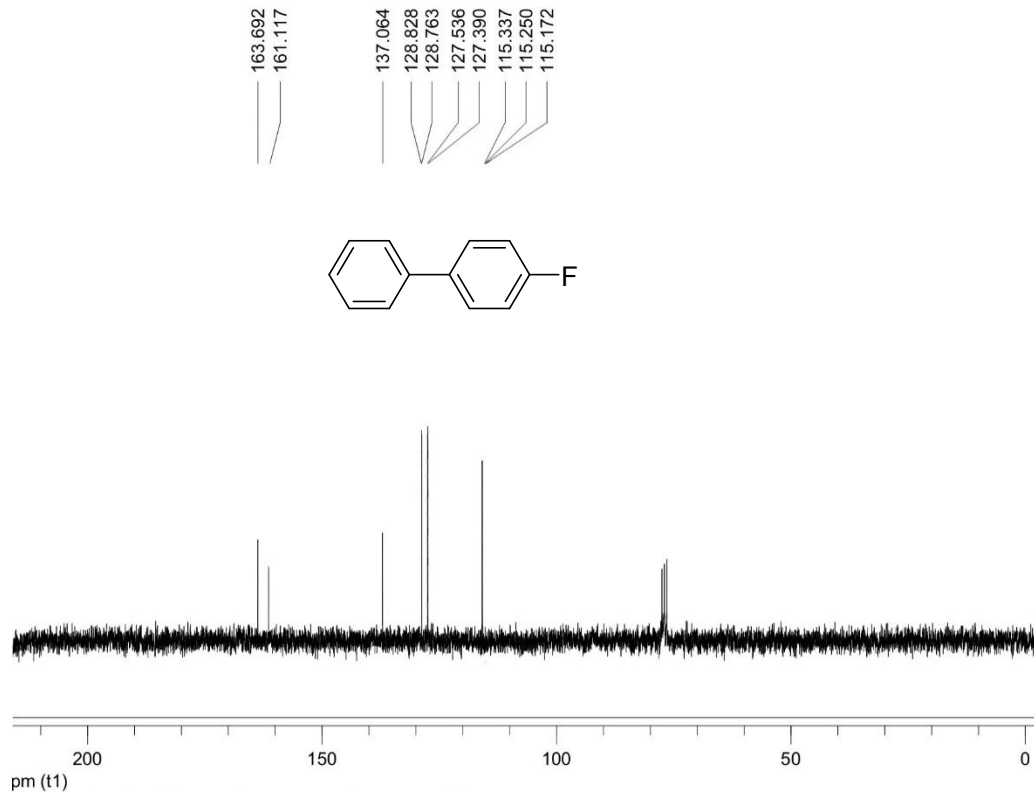

**Scheme S28.** <sup>13</sup>C-NMR spectra (63 MHz) of 4-fluorobiphenyl (C14) in CDCl<sub>3</sub>.

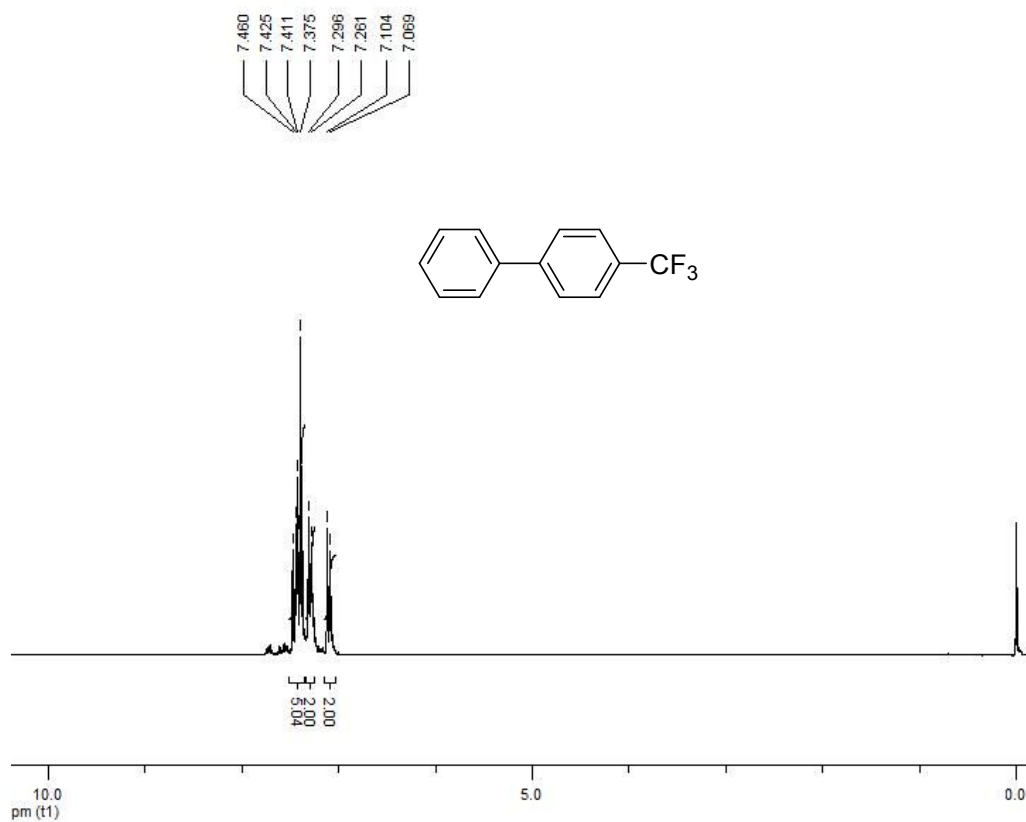

**Scheme S29.**  $^1\text{H-NMR}$  spectra (250 MHz) of 4-(trifluoromethyl)biphenyl (**C15**) in  $\text{CDCl}_3$ .

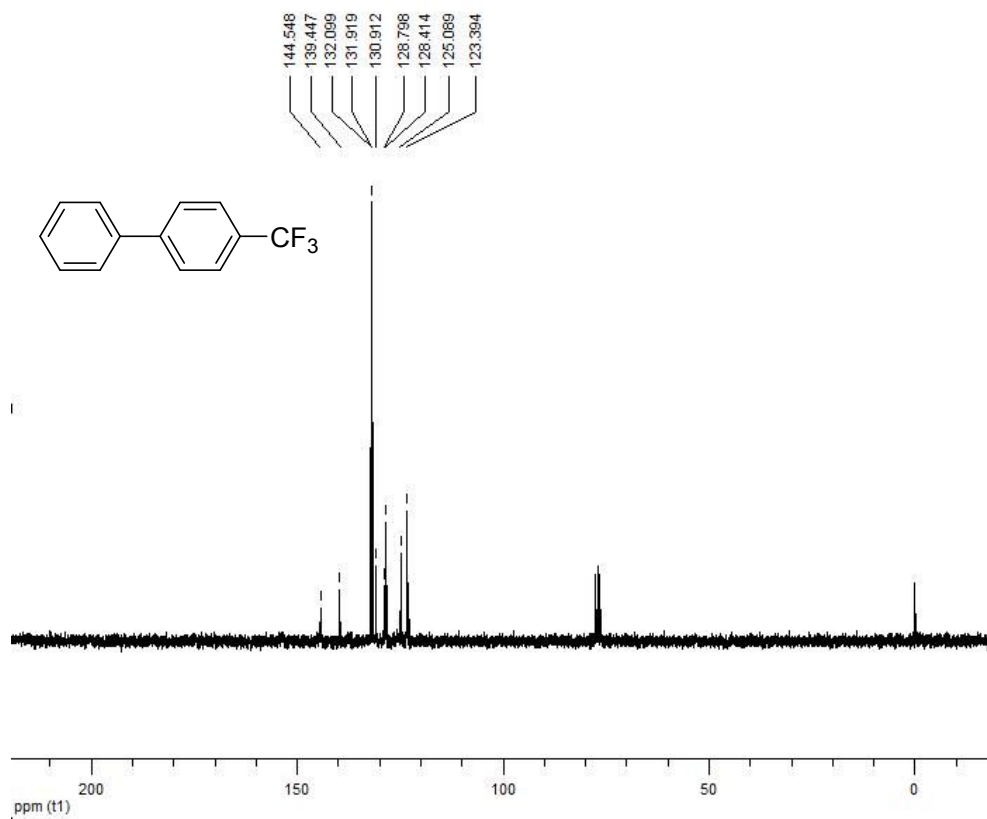

**Scheme S30.**  $^{13}\text{C-NMR}$  spectra (63 MHz) of 4-(trifluoromethyl)biphenyl (**C15**) in  $\text{CDCl}_3$ .

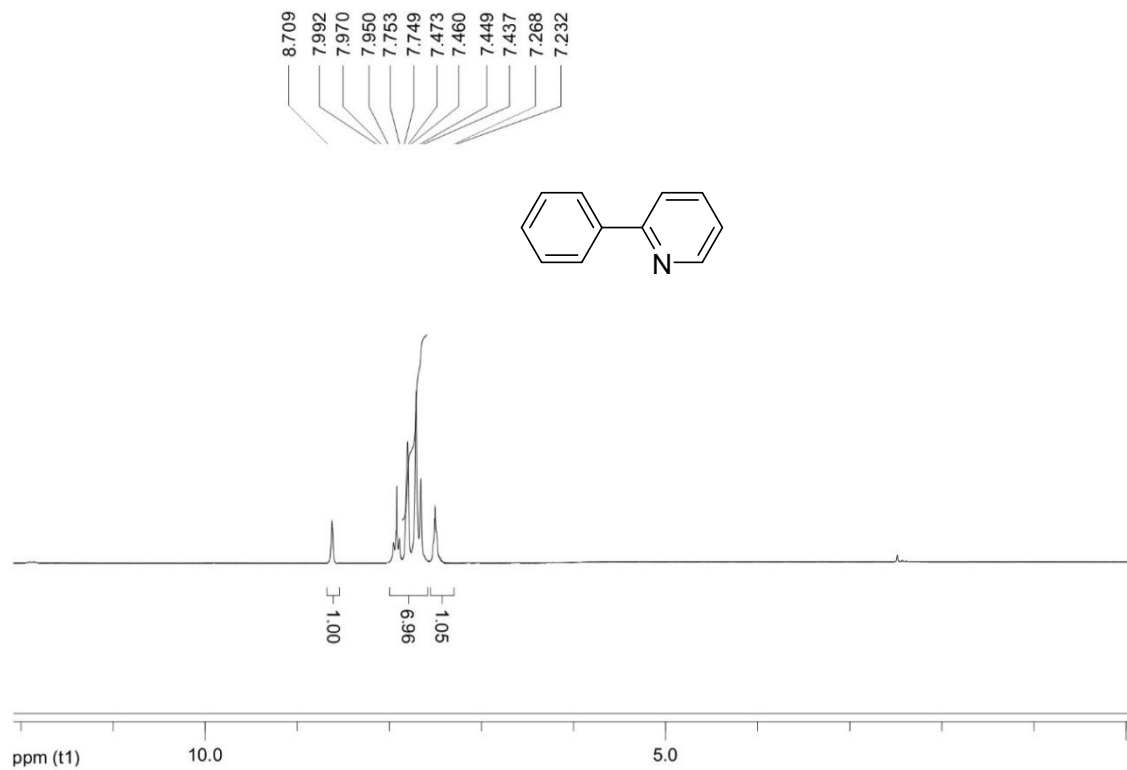

**Scheme S31.** <sup>1</sup>H-NMR spectra (250 MHz) of 2-phenylpyridine (C16) in CDCl<sub>3</sub>.

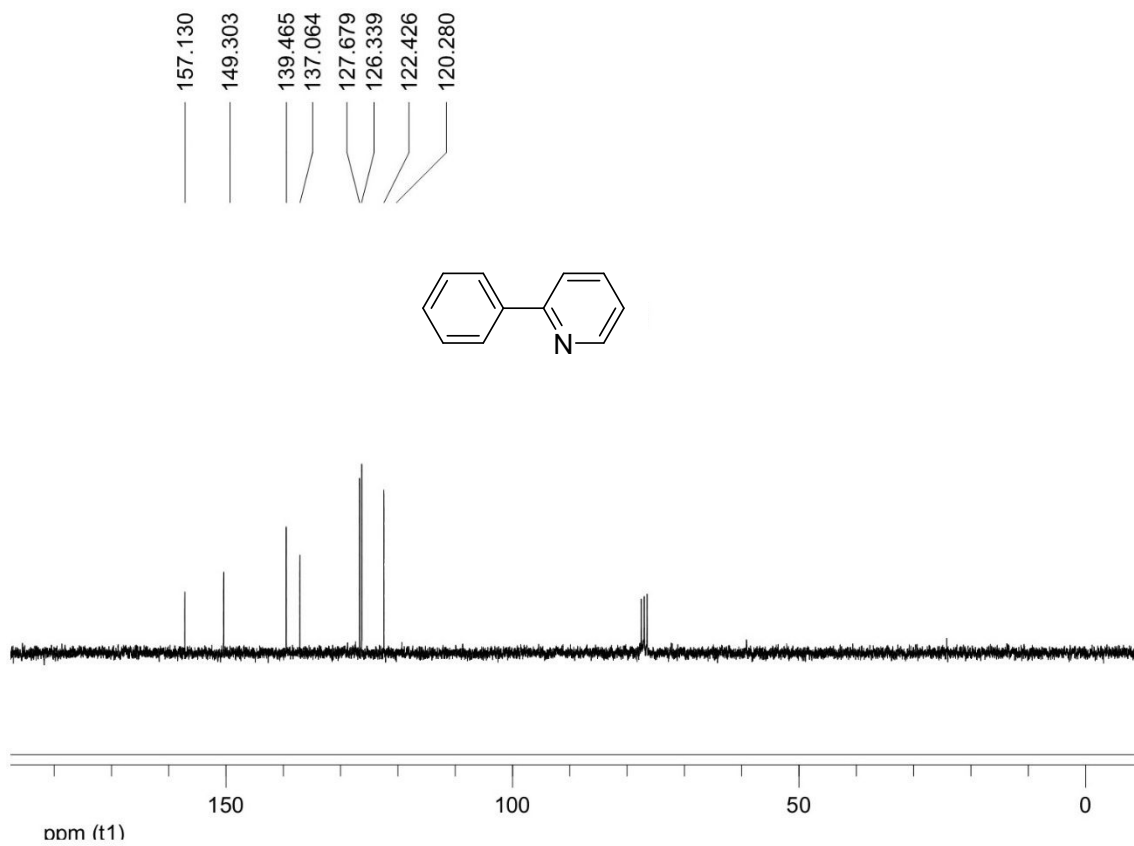

**Scheme S32.** <sup>13</sup>C-NMR spectra (63 MHz) of 2-phenylpyridine (C16) in CDCl<sub>3</sub>.

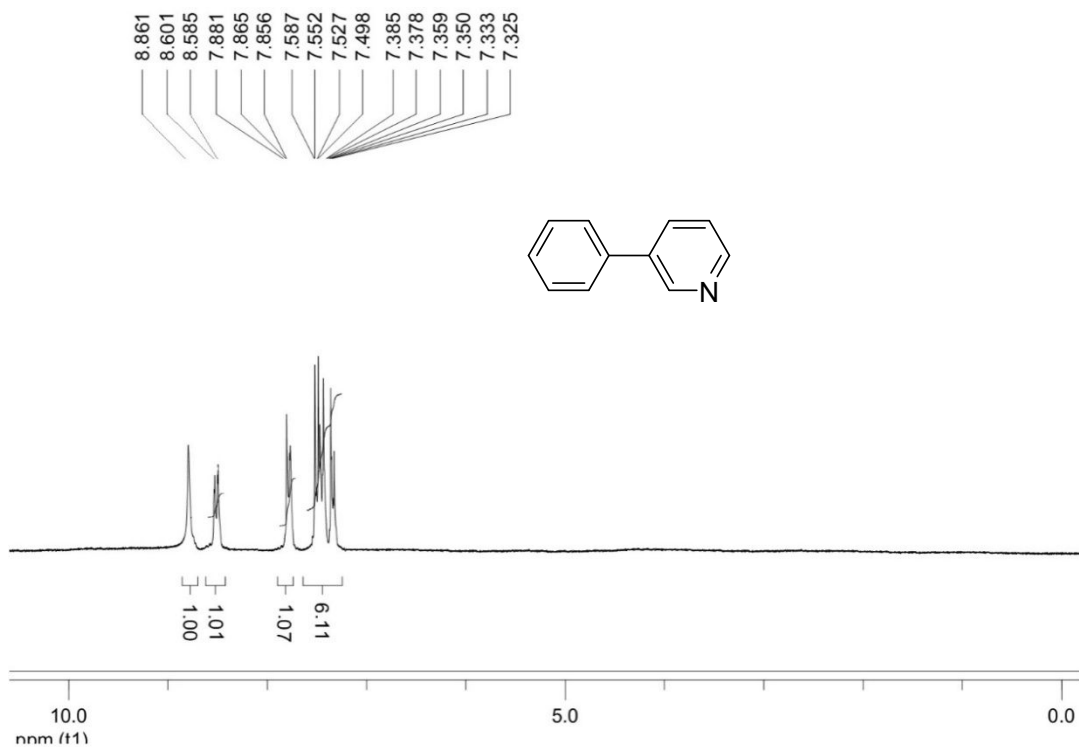

**Scheme S33.** <sup>1</sup>H-NMR spectra (250 MHz) of 3-phenylpyridine (C17) in CDCl<sub>3</sub>.

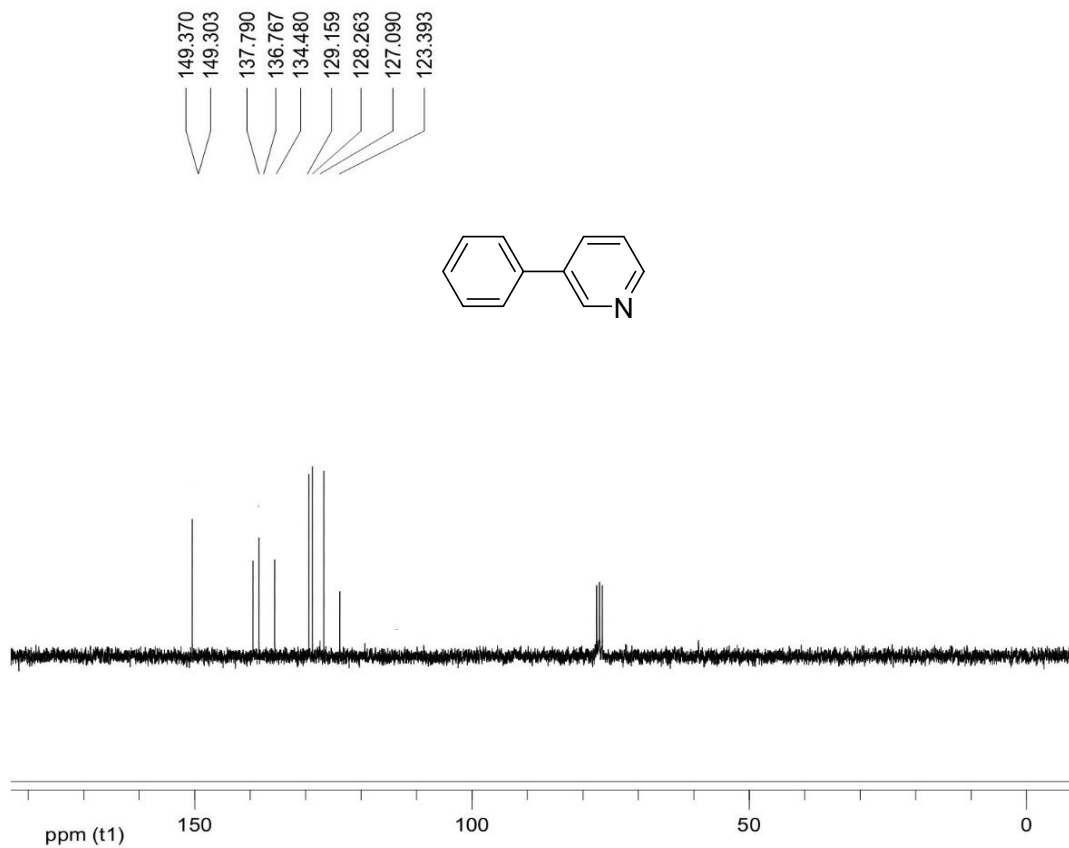

**Scheme S34.** <sup>13</sup>C-NMR spectra (63 MHz) of 3-phenylpyridine (C17) in CDCl<sub>3</sub>.

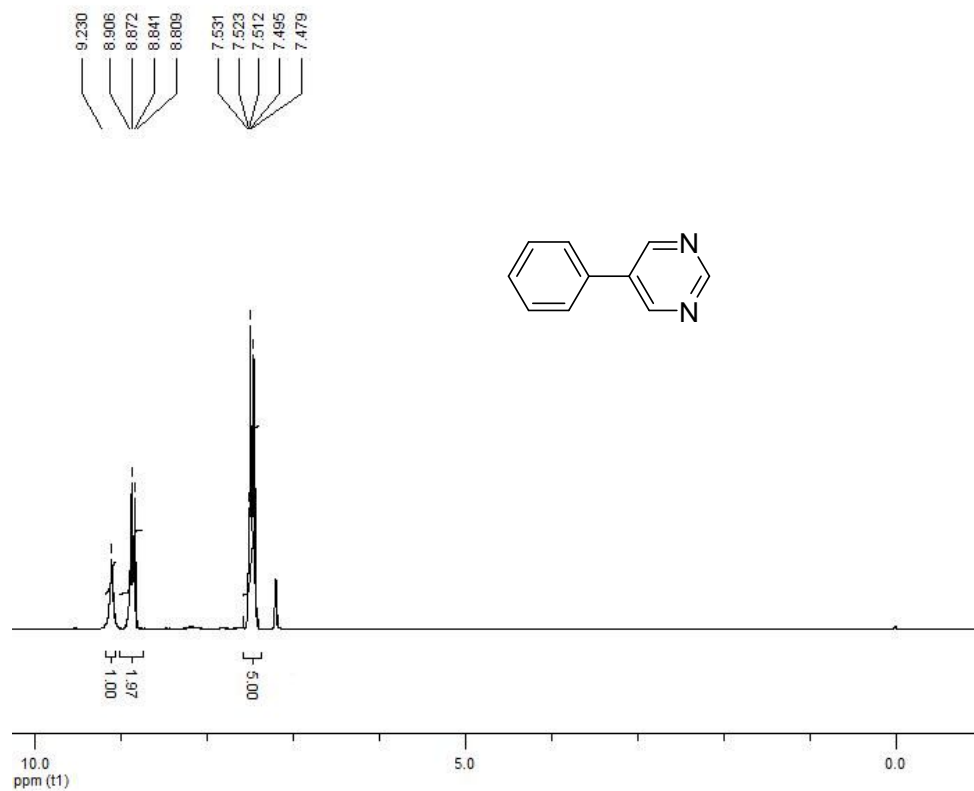

**Scheme S35.** <sup>1</sup>H-NMR spectra (250 MHz) of 5-phenylpyrimidine (C18) in CDCl<sub>3</sub>.

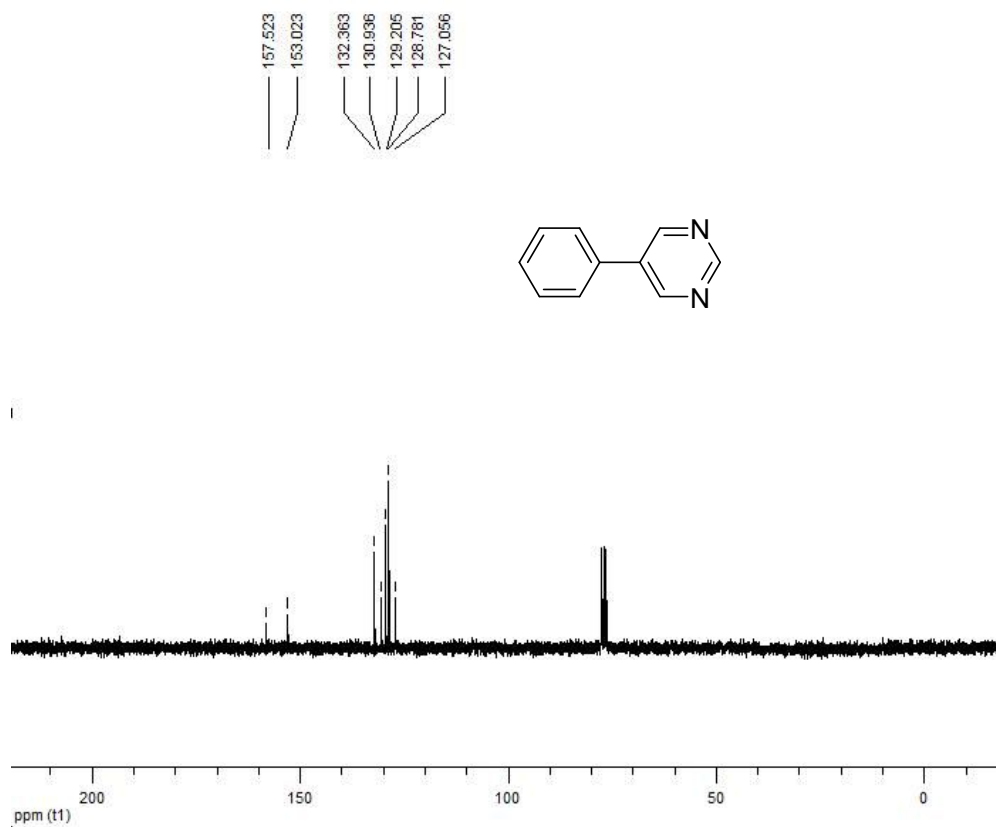

**Scheme S36.** <sup>13</sup>C-NMR spectra (63 MHz) of 5-phenylpyrimidine (C18) in CDCl<sub>3</sub>.

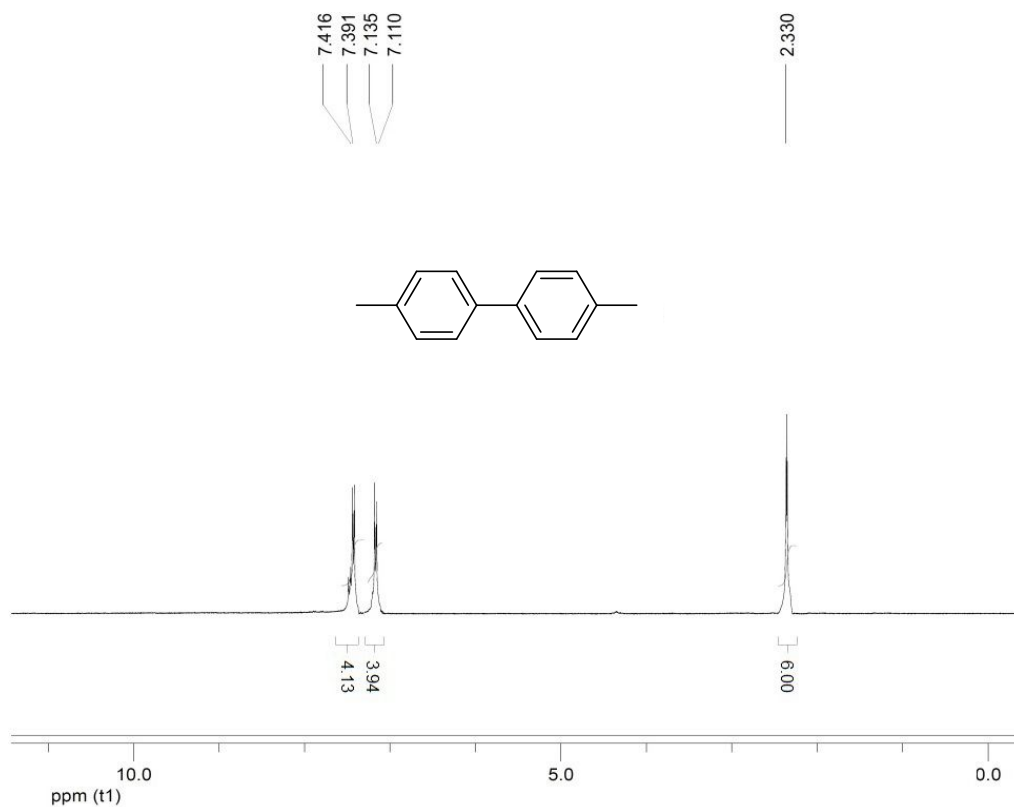

**Scheme S37.** <sup>1</sup>H-NMR spectra (250 MHz) of 4,4'-dimethylbiphenyl (C20) in CDCl<sub>3</sub>.

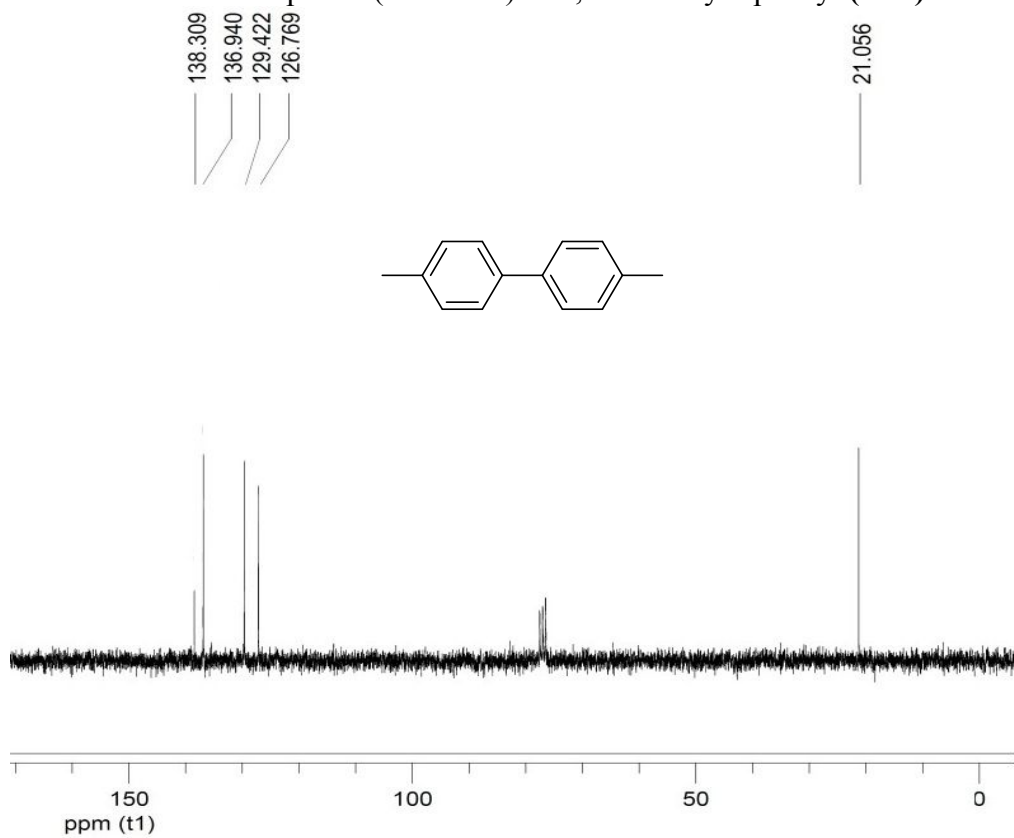

**Scheme S38.** <sup>13</sup>C-NMR spectra (63 MHz) of 4,4'-dimethylbiphenyl (C20) in CDCl<sub>3</sub>.





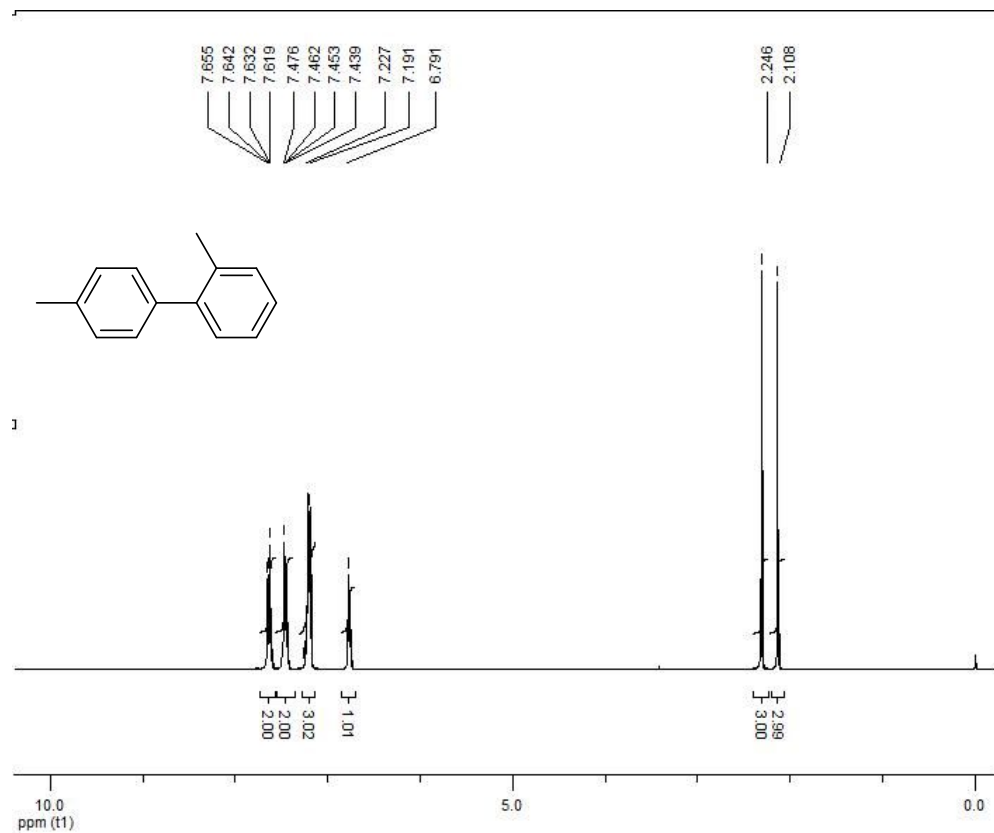

**Scheme S41.** <sup>1</sup>H-NMR spectra (250 MHz) of 2,4'-dimethylbiphenyl (C22) in CDCl<sub>3</sub>.

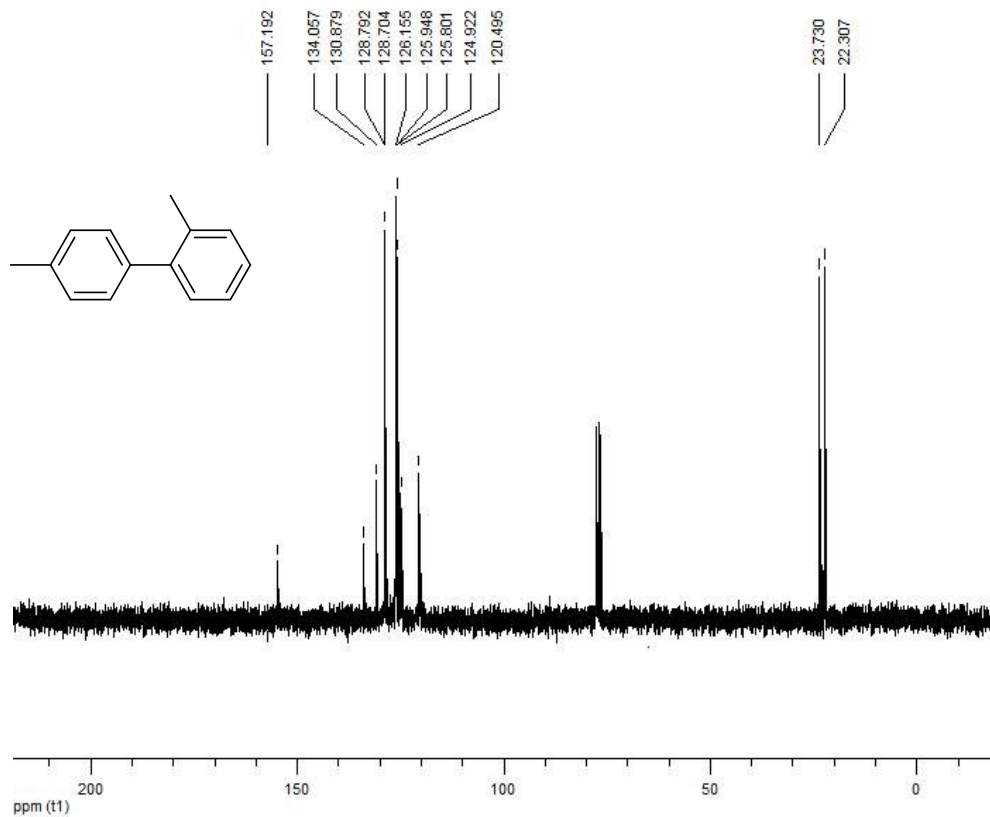

**Scheme S42.** <sup>13</sup>C-NMR spectra (63 MHz) of 2,4'-dimethylbiphenyl (C22) in CDCl<sub>3</sub>.

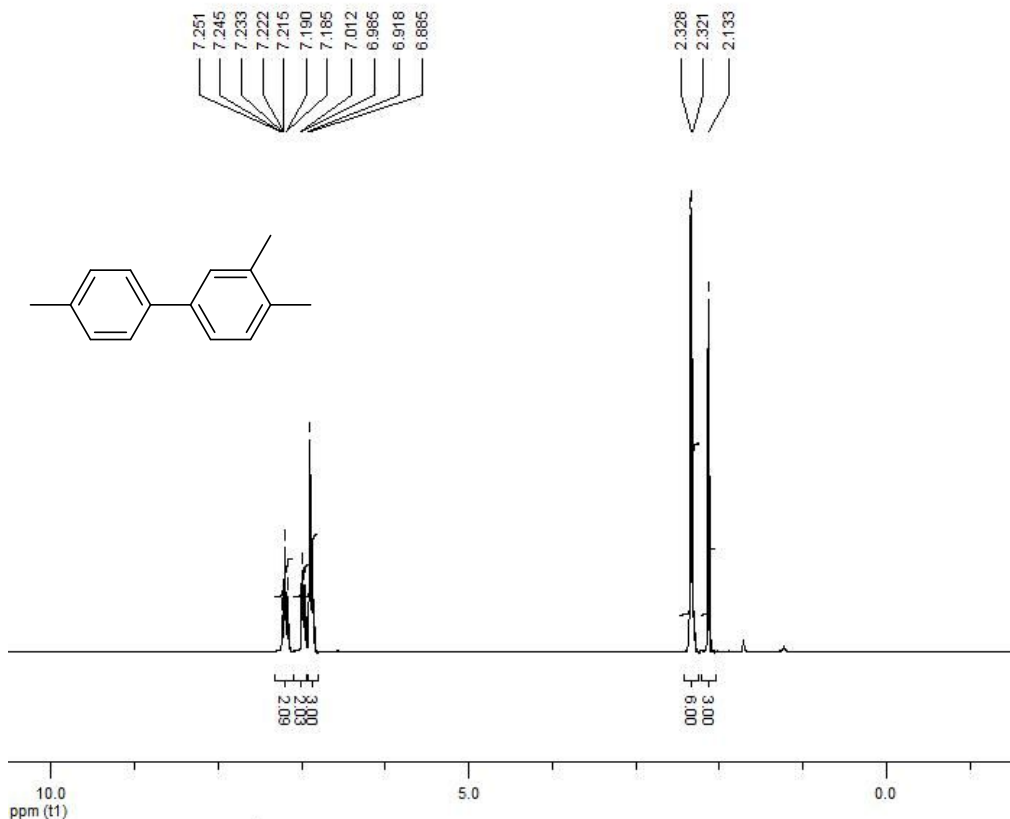

**Scheme S43.** <sup>1</sup>H-NMR spectra (250 MHz) of 3,4,4'-trimethylbiphenyl (C23) in CDCl<sub>3</sub>.

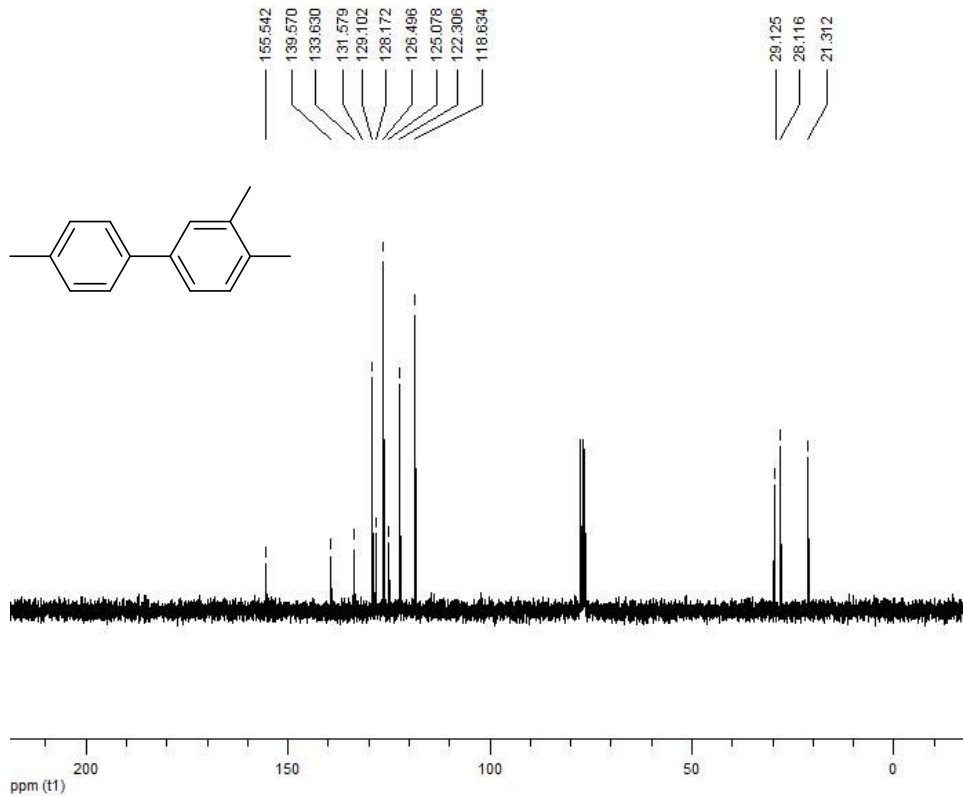

**Scheme S44.** <sup>13</sup>C-NMR spectra (63 MHz) of 3,4,4'-trimethylbiphenyl (C23) in CDCl<sub>3</sub>.

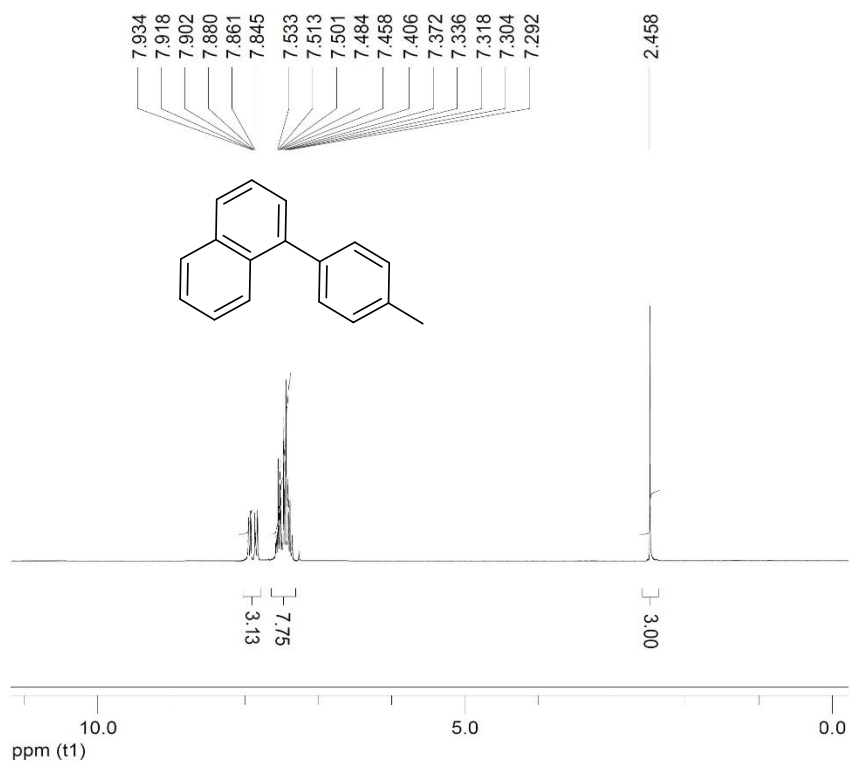

**Scheme S45.** <sup>1</sup>H-NMR spectra (250 MHz) of 1-(4-methylphenyl)naphthalene (**C24**) in CDCl<sub>3</sub>.

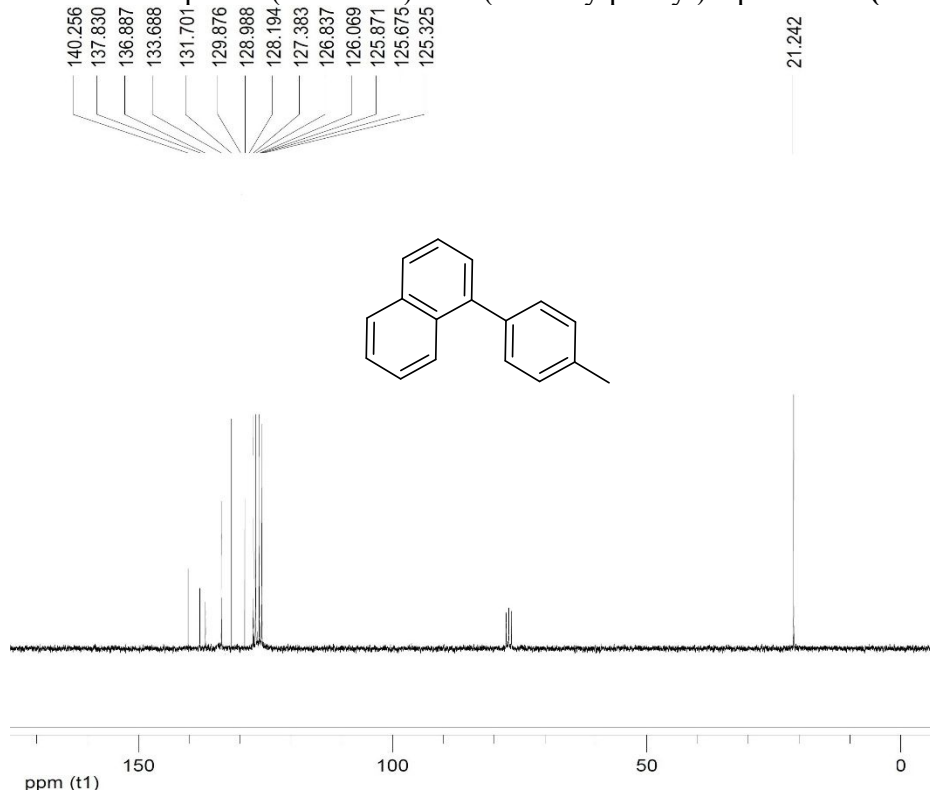

**Scheme S46.** <sup>13</sup>C-NMR spectra (63 MHz) of 1-(4-methylphenyl)naphthalene (**C24**) in CDCl<sub>3</sub>.

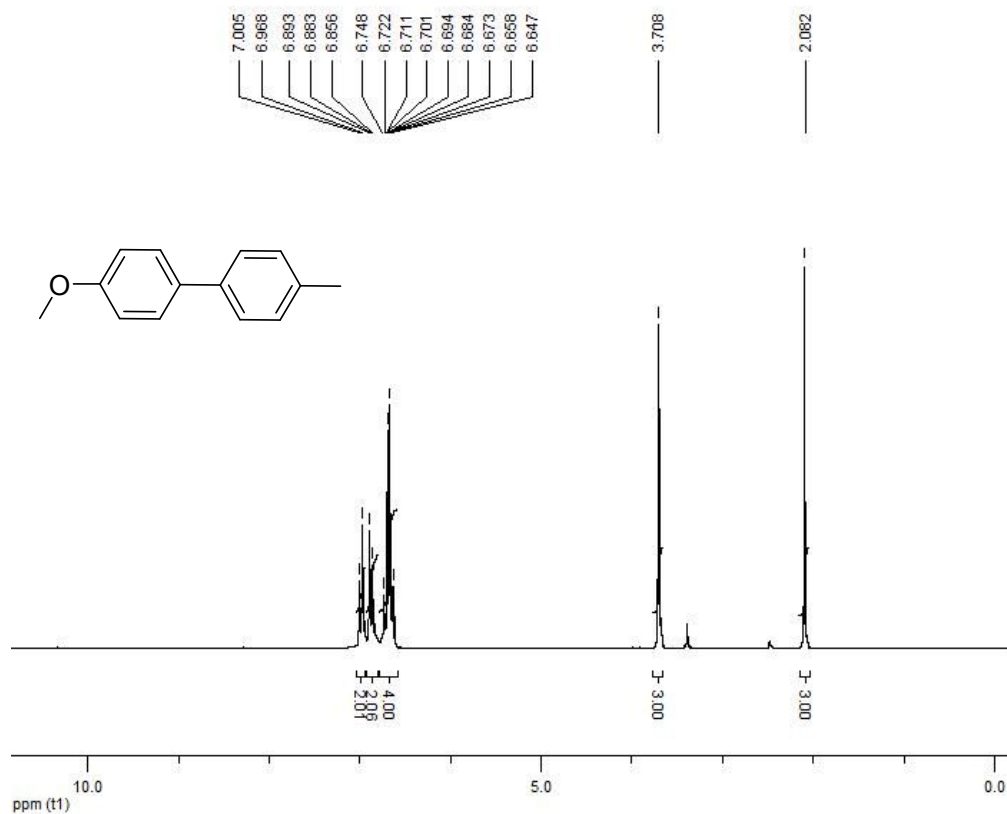

**Scheme S47.** <sup>1</sup>H-NMR spectra (250 MHz) of 4-methoxy-4'-methylbiphenyl (**C25**) in CDCl<sub>3</sub>.

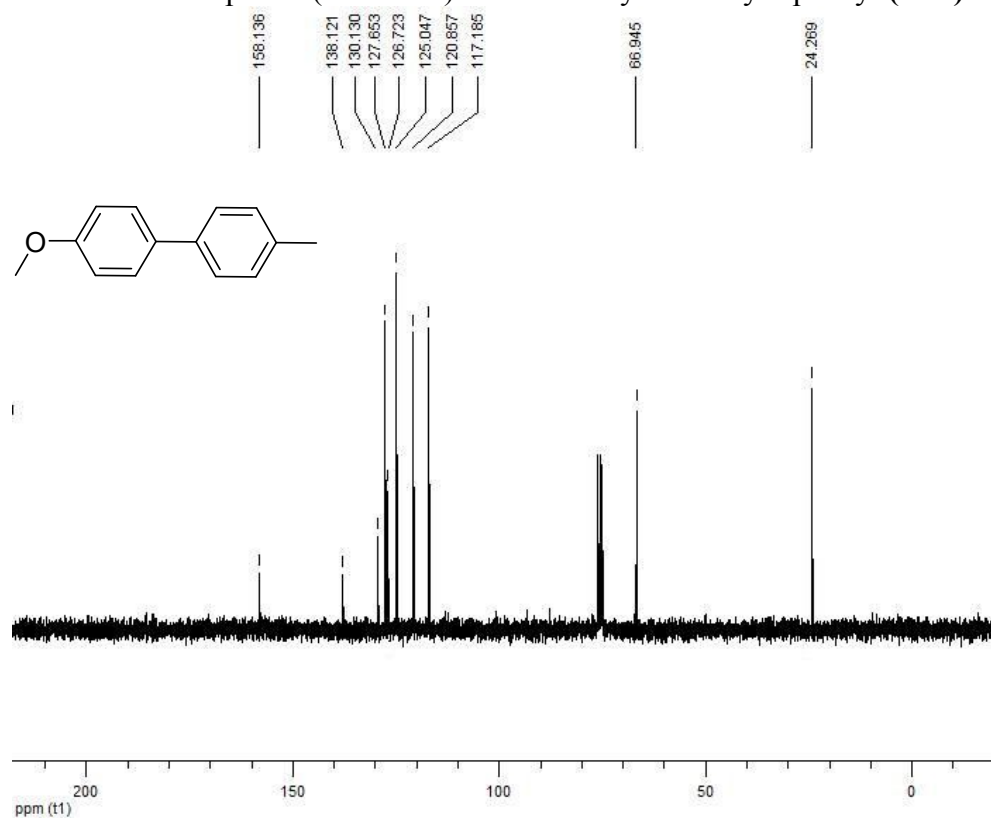

**Scheme S48.** <sup>13</sup>C-NMR spectra (63 MHz) of 4-methoxy-4'-methylbiphenyl (**C25**) in CDCl<sub>3</sub>.

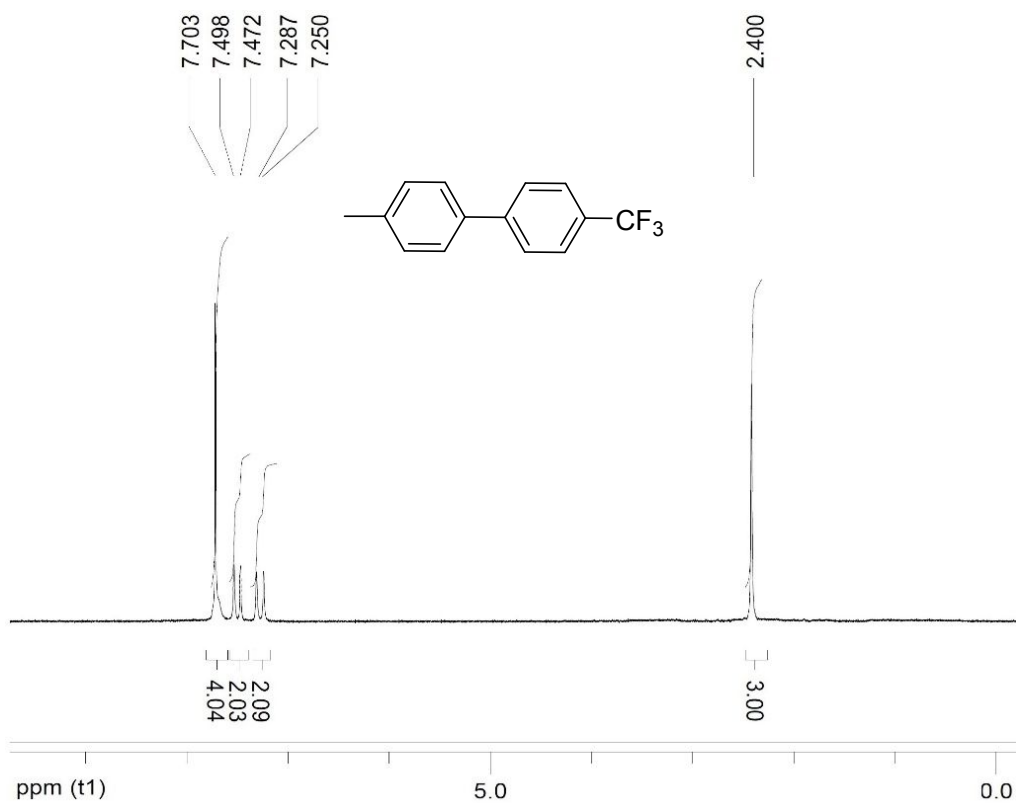

**Scheme S49.**  $^1\text{H-NMR}$  spectra (250 MHz) of 4-methyl-4'-(trifluoromethyl)biphenyl (**C26**) in  $\text{CDCl}_3$ .

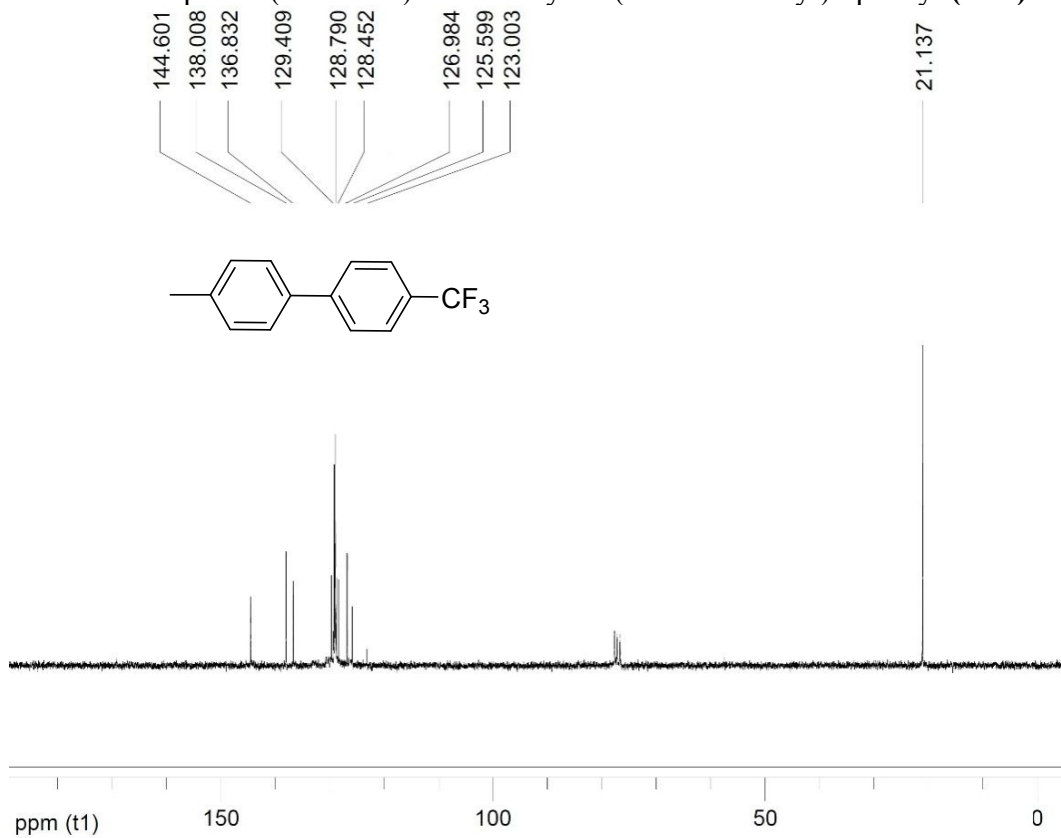

**Scheme S50.**  $^{13}\text{C-NMR}$  spectra (63 MHz) of 4-methyl-4'-(trifluoromethyl)biphenyl (**C26**) in  $\text{CDCl}_3$ .

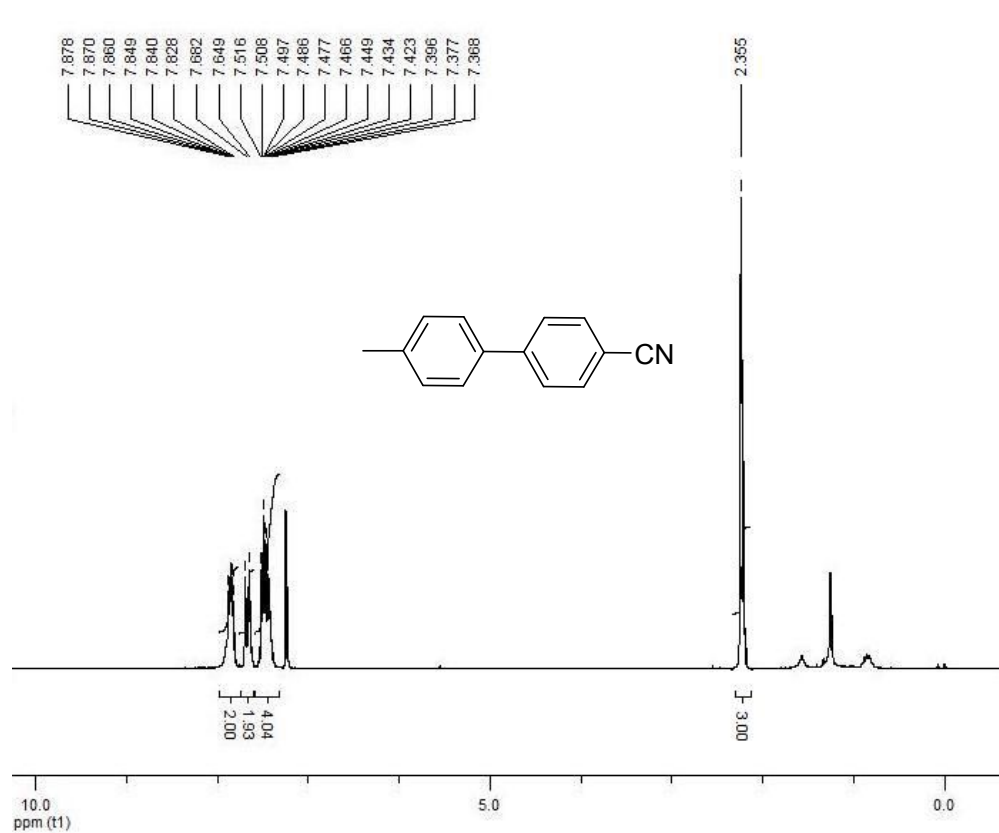

**Scheme S51.** <sup>1</sup>H-NMR spectra (250 MHz) of 4'-methyl-4-biphenylcarbonitrile (**C27**) in CDCl<sub>3</sub>.

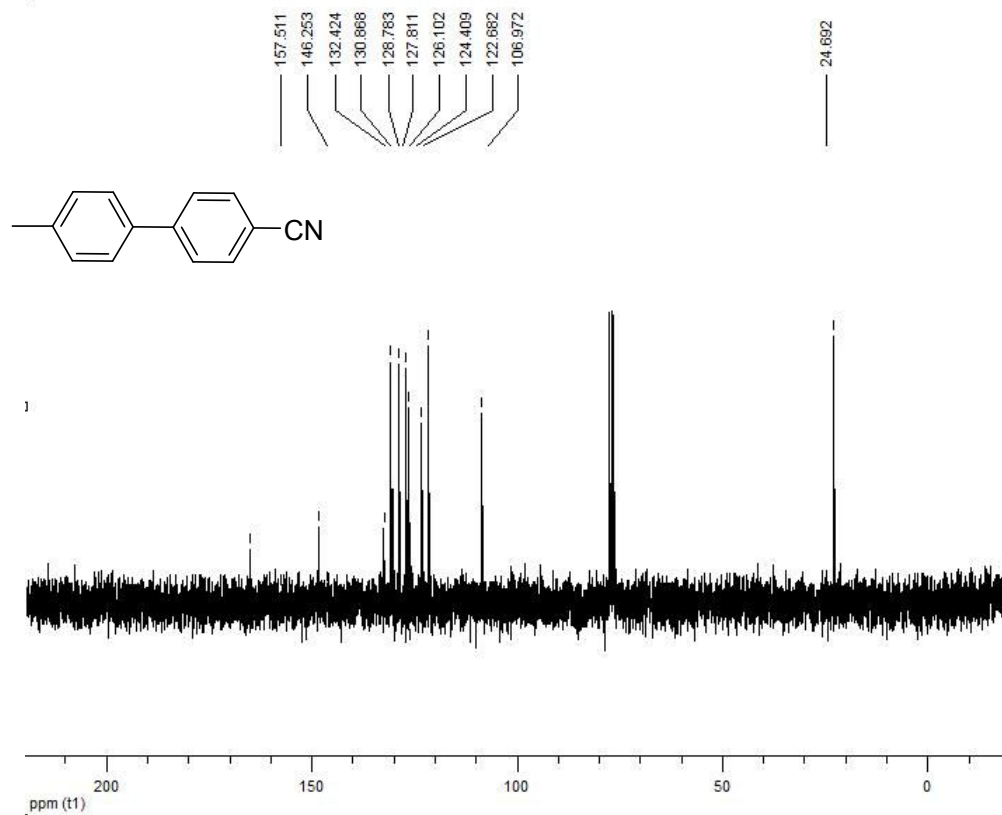

**Scheme S52.** <sup>13</sup>C-NMR spectra (63 MHz) of 4'-methyl-4-biphenylcarbonitrile (**C27**) in CDCl<sub>3</sub>.

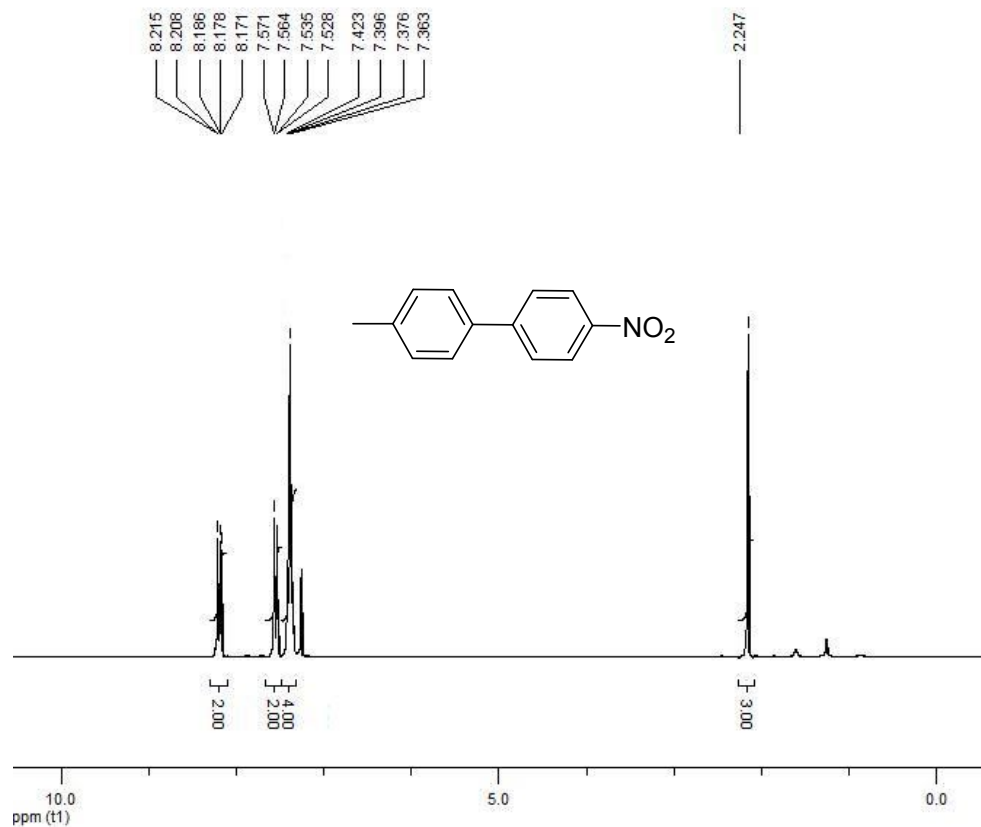

**Scheme S53.** <sup>1</sup>H-NMR spectra (250 MHz) of 4-methyl-4'-nitrobiphenyl (**C28**) in CDCl<sub>3</sub>.

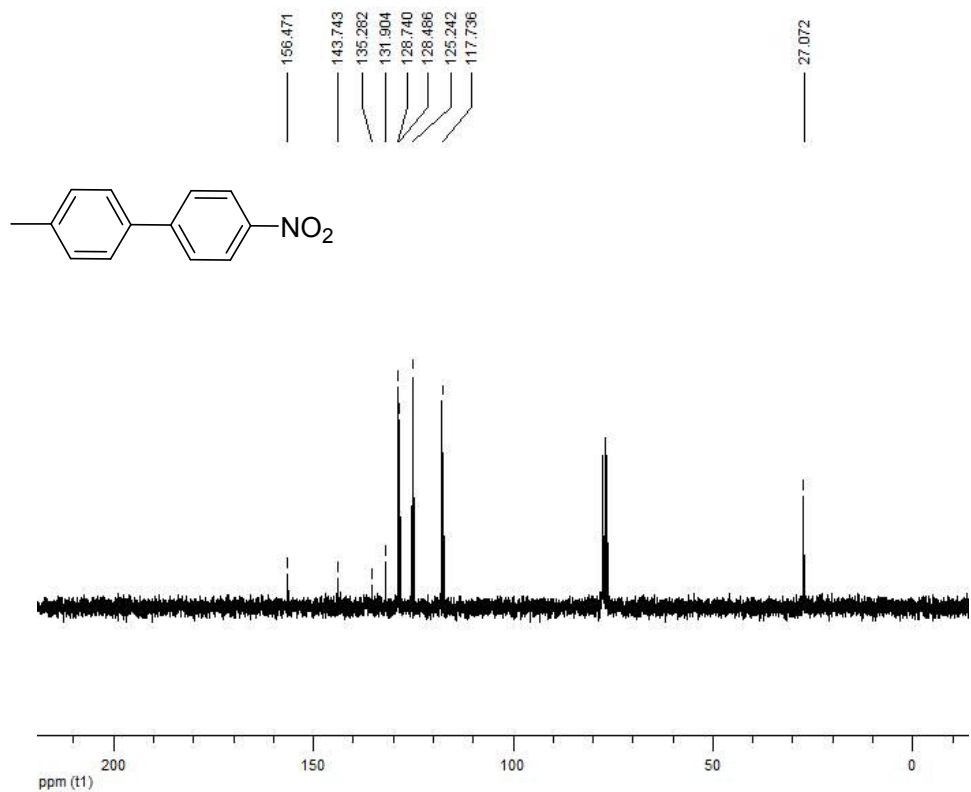

**Scheme S54.** <sup>13</sup>C-NMR spectra (63 MHz) of 4-methyl-4'-nitrobiphenyl (**C28**) in CDCl<sub>3</sub>.



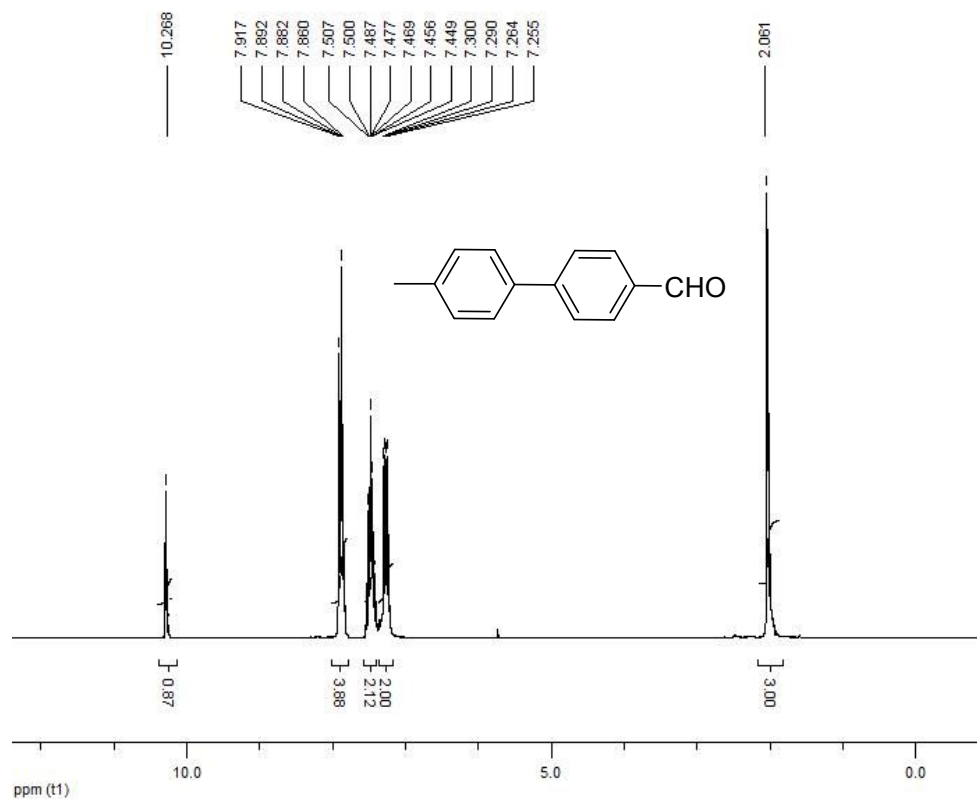

**Scheme S55.** <sup>1</sup>H-NMR spectra (250 MHz) of 4'-methyl-4-biphenylcarbaldehyde (**C29**) in CDCl<sub>3</sub>.

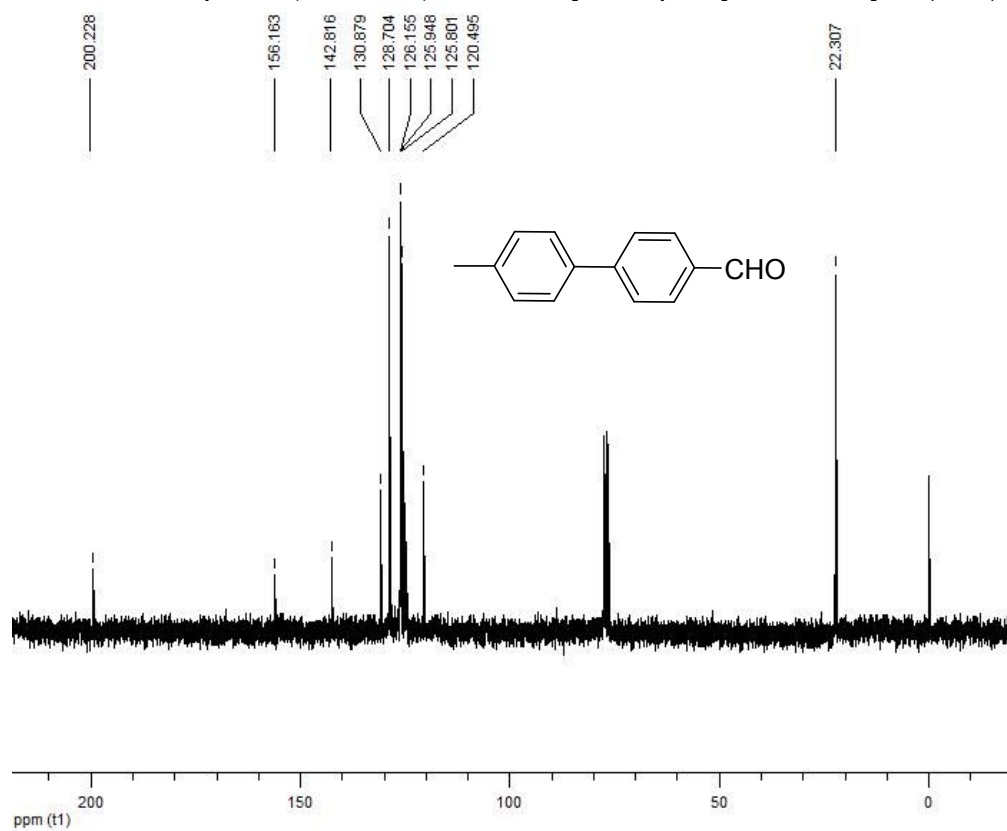

**Scheme S56.** <sup>13</sup>C-NMR spectra (63 MHz) of 4'-methyl-4-biphenylcarbaldehyde (**C29**) in CDCl<sub>3</sub>.

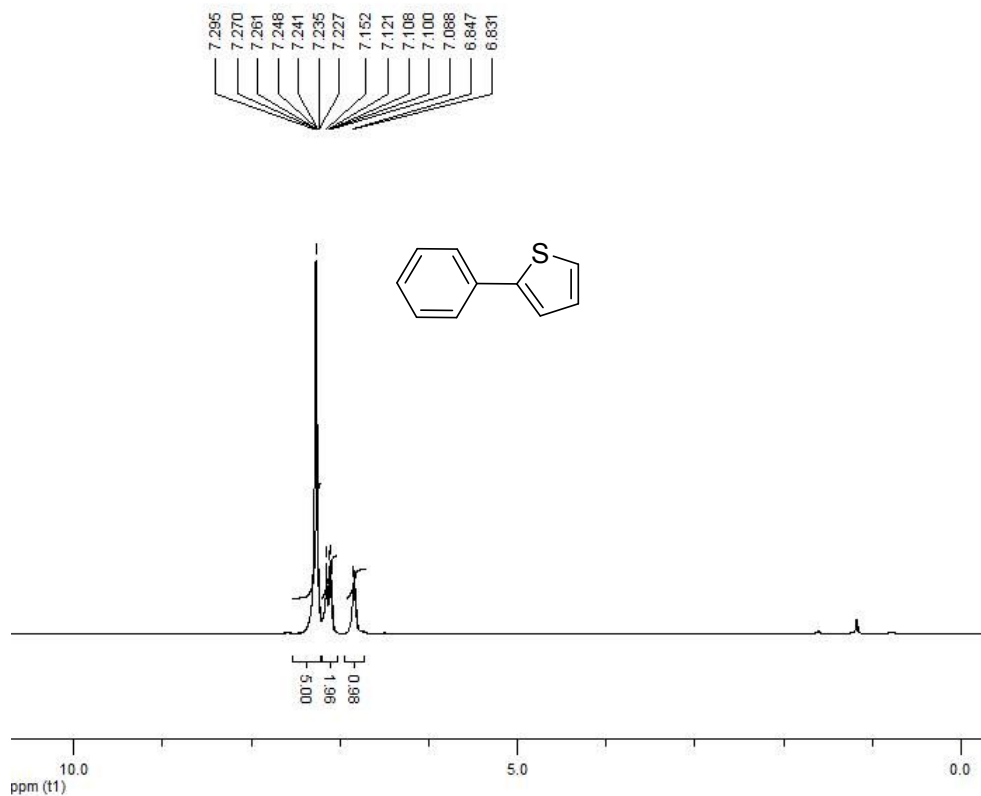

**Scheme S57.** <sup>1</sup>H-NMR spectra (250 MHz) of 2-phenylthiophene (C30) in CDCl<sub>3</sub>.

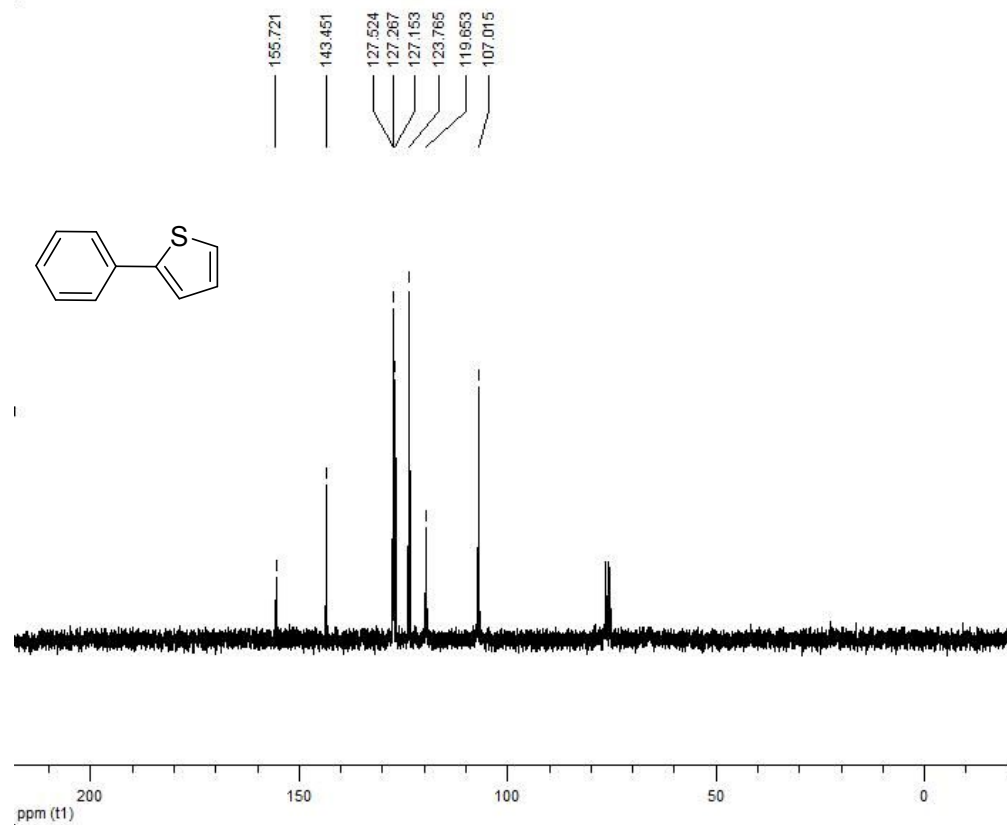

**Scheme S58.** <sup>13</sup>C-NMR spectra (63 MHz) of 2-phenylthiophene (C30) in CDCl<sub>3</sub>.

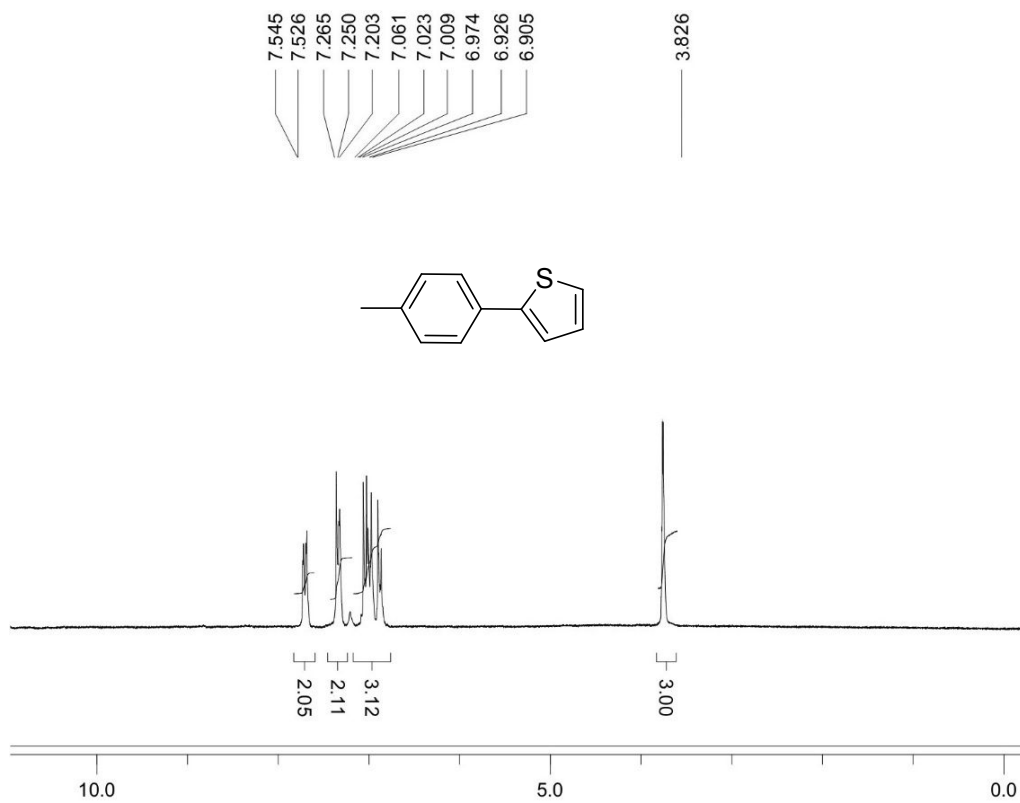

**Scheme S59.** <sup>1</sup>H-NMR spectra (250 MHz) of 2-(4-methoxyphenyl)thiophene (C31) in CDCl<sub>3</sub>.

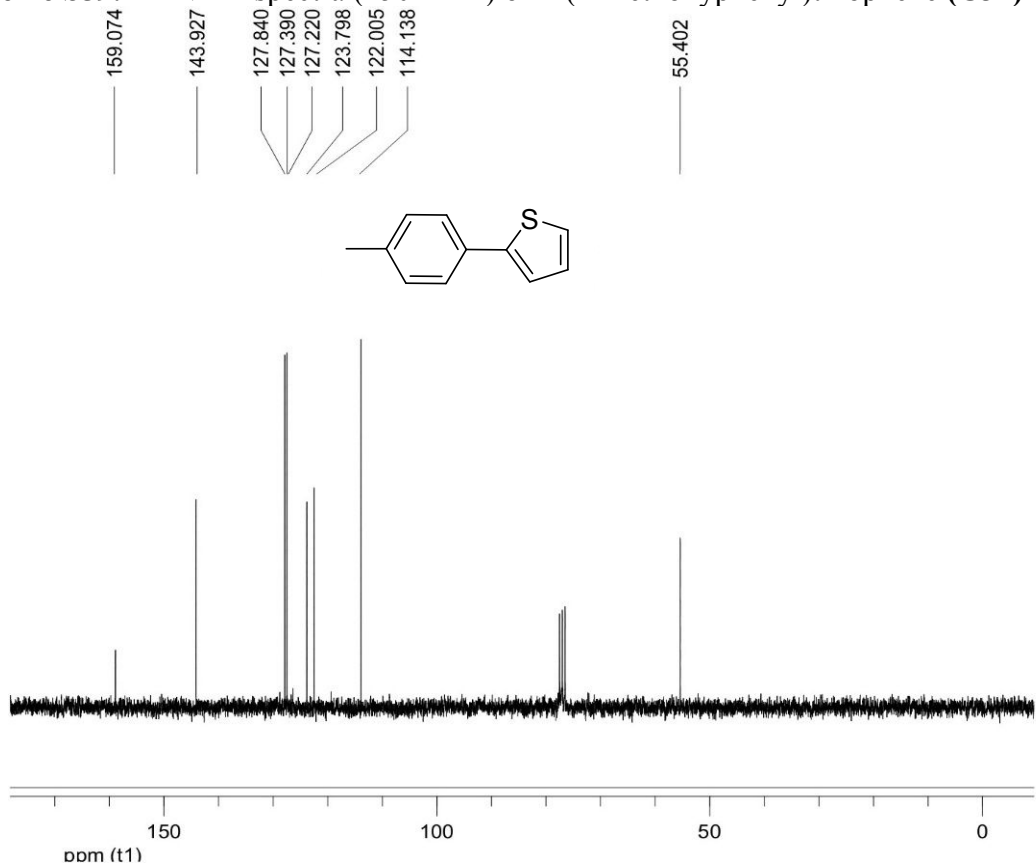

**Scheme S60.** <sup>13</sup>C-NMR spectra (63 MHz) of 2-(4-methoxyphenyl)thiophene (C31) in CDCl<sub>3</sub>.

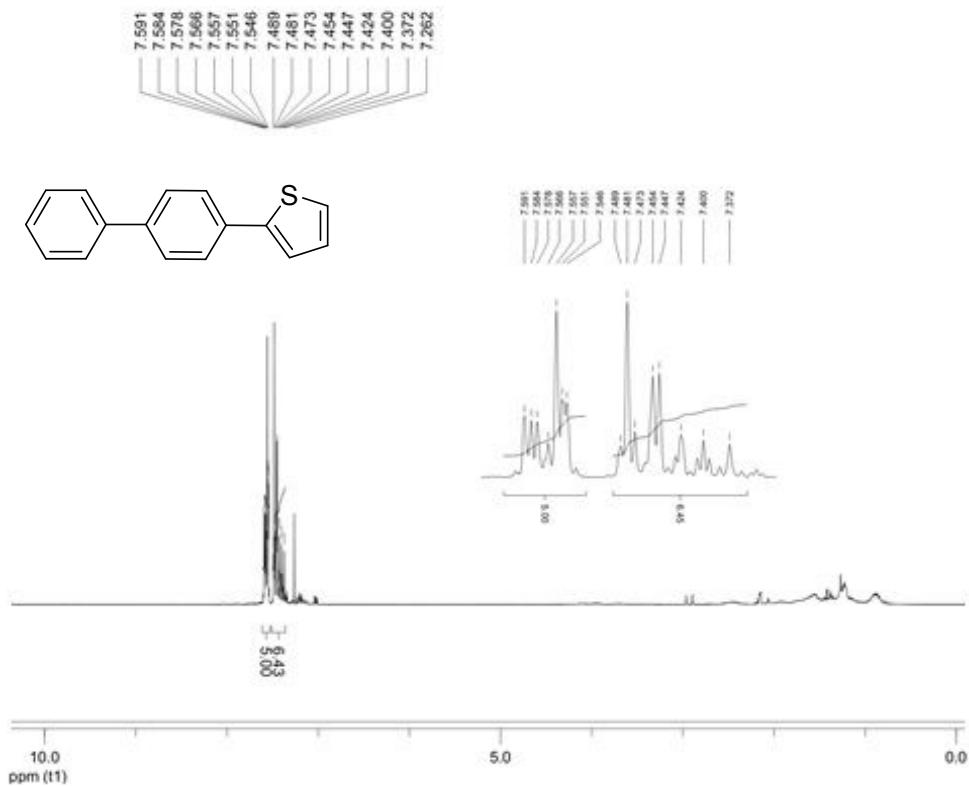

**Scheme S61.** <sup>1</sup>H-NMR spectra (250 MHz) of 2-(biphenyl-4-yl)thiophene (C32) in CDCl<sub>3</sub>.

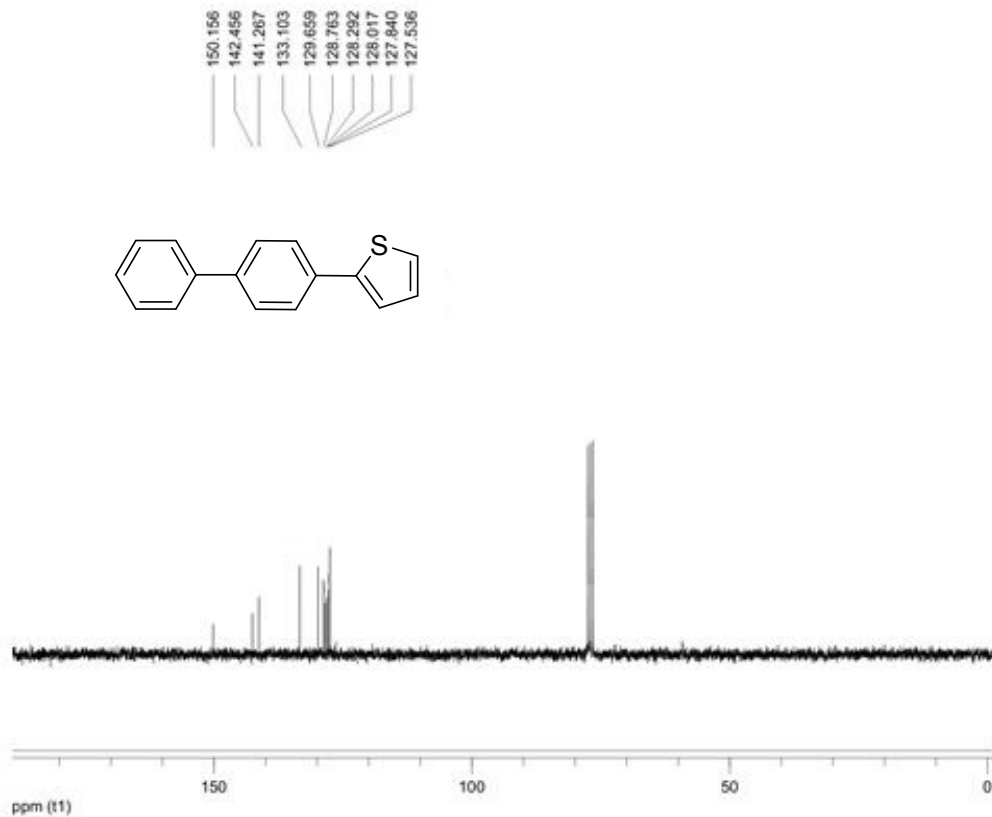

**Scheme S62.** <sup>13</sup>C-NMR spectra (63 MHz) of 2-(biphenyl-4-yl)thiophene (C32) in CDCl<sub>3</sub>.

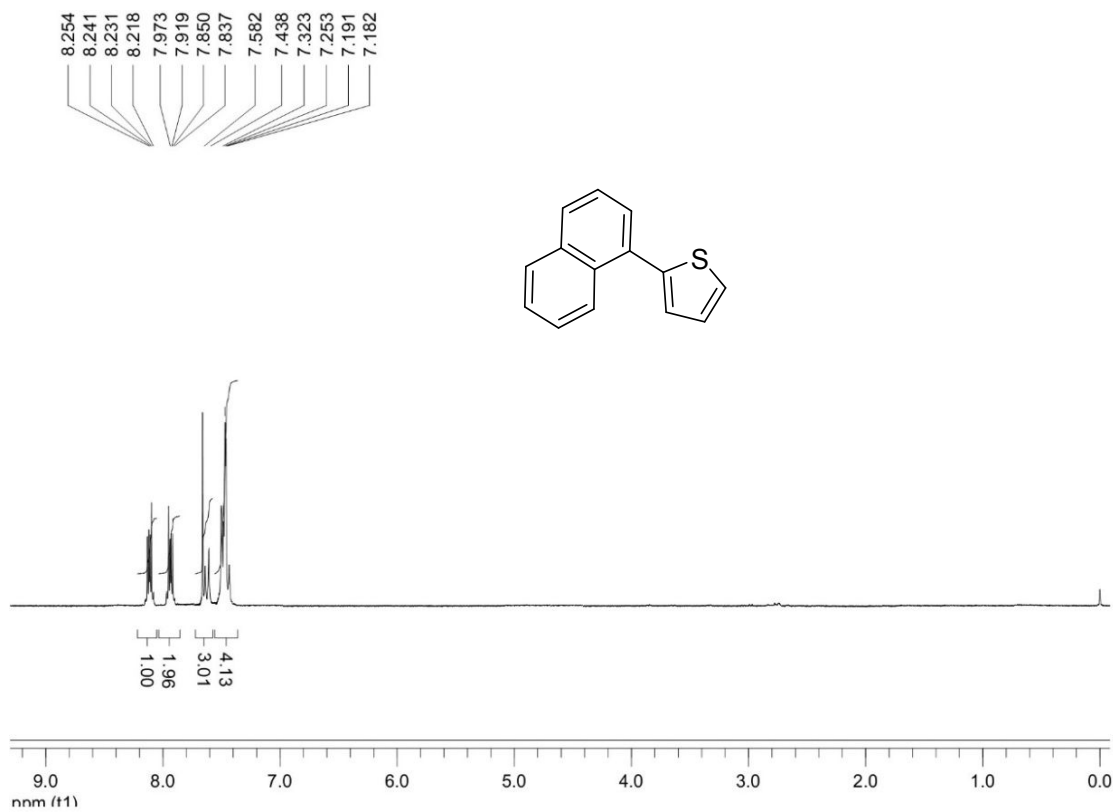

**Scheme S63.** <sup>1</sup>H-NMR spectra (250 MHz) of 2-(naphthalen-1-yl)thiophene (C33) in CDCl<sub>3</sub>.

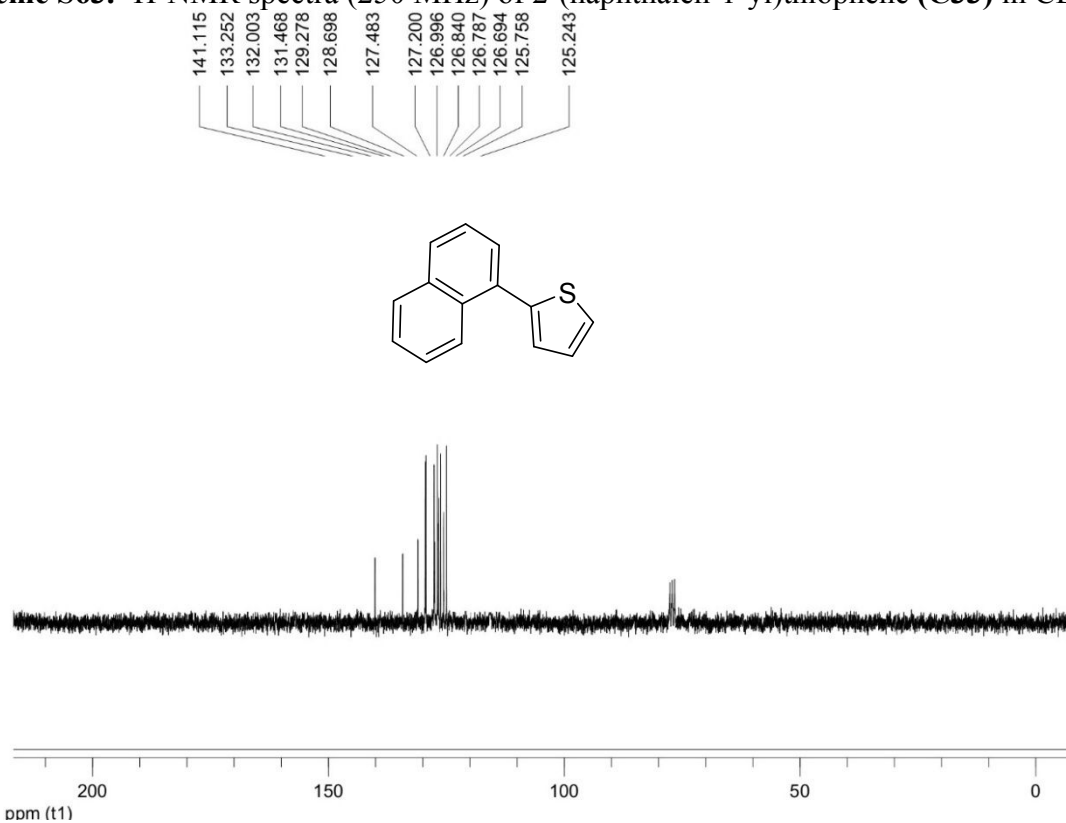

**Scheme S64.** <sup>13</sup>C-NMR spectra (63 MHz) of 2-(naphthalen-1-yl)thiophene (C33) in CDCl<sub>3</sub>.
